## **Excellent repigmentation was observed in the treatment of refractory vitiligo with autologous cultured epithelium grafting: a real-world retrospective cohort study**

**Authors:** Jian Li, MD<sup>†1</sup>, Xuanhao Zeng, MD<sup>†1</sup>, Shujun Chen, MD<sup>†1</sup>, Luyan Tang, MD<sup>1</sup>, Qi Zhang, MD<sup>1</sup>, Minzi Lv, M.M<sup>2</sup>, Taro Uyama, PhD<sup>3</sup>, Fuyue Wu, PhD<sup>3</sup>, Weiling Lian, MBBS<sup>1</sup>, Jinqi Wang, M.M<sup>1</sup>, Haozhen Lv, MBBS<sup>1</sup>, Yating Liu, MBBS<sup>1</sup>, Jinfeng Wu, PhD\*<sup>1</sup>, Jinhua Xu, MD\*<sup>1</sup>,

### **Affiliations:**

<sup>1</sup>Department of Dermatology, Huashan Hospital of Fudan University, Shanghai, China;

<sup>2</sup>Centre of evidence medicine, Fudan University, Shanghai, China;

<sup>3</sup>ReMed Regenerative Medicine Clinical Application Institute, Shanghai, China

\*Correspondence author, wujinfeng21@163.com, xjhhsyy@163.com.

§ These authors contributed equally to this work. Requests for materials were sent to the author.

**One sentence summary:** Autologous cultured epithelial grafting (ACEG) technique is a promising therapy for refractory vitiligo.

### **Abstract:**

Surgical intervention is considered as the mainstream therapy for refractory vitiligo. In this study, we developed a modified autologous cultured epithelial grafting (ACEG) technique for the surgical treatment of vitiligo. A total of 726 patients with vitiligo treated with ACEG were enrolled from January 2015 to June 2019 in China. Patient characteristics, such as sex, age, clinical type, lesion sites, course of the disease, and disease stable period, were recorded. In 2118 skin lesions from 726 patients who received ACEG, total efficacy rate was 82.81% (1754/2118). However, the repigmentation rate of the ACEG was 64.87%, which was higher than that of conventional surgical interventions (52.69%). Patients with segmental vitiligo, skin lesions in the lower limbs, aged 18 years or below, and a stable period of over 3 years might have a good response to ACEG. Single-cell RNA sequencing was performed to observe different cell compositions in the skin before and after ACEG. The number of melanocytes increased by 50% after transplantation. In addition, there was a significant increase in hair follicle outer root sheath-derived keratinocytes in ACEG, and the numbers of these cells in the repigmentation

sites 1 year after ACEG were still higher than those in the skin lesions. Therefore, ACEG is a promising therapeutic agent for refractory vitiligo. Age, clinical type, lesion site, and lesion stable period before surgery have significant impacts on repigmentation in ACEG. ACEG can increase the number of melanocytes and KRT6C+ keratinocytes in skin lesions, thereby restoring a skin microenvironment suitable for melanocyte survival.

## **Main Text:**

### **INTRODUCTION**

Vitiligo is a skin disease characterized by acquired depigmentation( 1). Although vitiligo is not fatal, it significantly affects patients' quality of life (QOL) through psychological burden and social exclusion(2). Fifty-seven percent of patients have reported that vitiligo moderately or severely affect their QOL(3). Conventional treatments for vitiligo include: phototherapy, topical corticosteroids, and calcineurin inhibitors. However, these treatment options only provide partial repigmentation in many patients(4).

Surgical interventions are mainstream therapies for refractory vitiligo that are resistant to conventional approaches. Surgical techniques for vitiligo include tissue and cellular grafting ( 5). Tissue grafting includes: punch grafting, suction blister epidermal grafting (SBEG), and thin skin grafting(6, 7). There are three types of cellular grafting: cultured epidermal cell suspension (CECS), noncultured epidermal cell suspension (NCES), and noncultured follicular cell suspension (NCFC)(8). In a recent systematic review and meta-analysis that included 117 unique studies and 8776 unique patients, the rates of repigmentation above 90% and 50% after a single session of all surgical interventions were 52.69% and 81.01%, respectively(9). However, conventional surgical interventions have several limitations. For example, owing to the limited size of the normal epidermis, tissue grafting is not suitable for large areas of vitiligo, whereas cellular grafting is not easily fixed in skin lesions of vitiligo, and usually causes uneven repigmentation in special parts of the body, such as the nose and lip( 10).

In 1975, Green et al. first cultivated human keratinocytes on a feeder layer of lethally irritated 3T3-J2 mouse embryonic fibroblasts, and then obtained cultured epidermal sheets (11). The advantage of this technique is that it can obtain a large epidermal sheet by consuming a relatively small epidermis. In 2013, Kumagai et al. adopted Green's technique for the treatment of 27 vitiligo patients, and reported good repigmentation(12). However, this technique also has several limitations. Human keratinocytes can be cultivated on a feeder layer of mouse fibroblasts in fetal bovine serum-containing medium, which might contain potentially harmful agents, such as bovine spongiform encephalopathy and murine viruses(13).

To overcome these limitations, we developed a modified autologous cultured epithelial grafting (ACEG) technique under serum-free and feeder-free conditions. We have applied this technique in treating over 1000 patients with vitiligo since 2015. To obtain substantial evidence regarding the efficacy and safety of this technique for refractory vitiligo, we conducted a real-world study with a large-scale sample size.

To explore the mechanism of repigmentation after ACEG treatment, single-cell RNA sequencing (scRNA-seq) was performed to observe the differences in cell composition in the skin of patients with vitiligo before and after ACEG treatment.

## **RESULTS**

### **Patient characteristics and therapeutic effects of ACEG**

This retrospective study included 790 patients with vitiligo who were treated with ACEG. Patients who lacked data or had poor photo quality, as well as those who could not be contacted, were excluded. Furthermore, 726 patients were included, with a total of 2118 skin lesions treated with ACEG, including 347 men (47.8%) and 379 women (52.2%) (Fig.1). The average age was  $23.56 \pm 9.5$  years old, with the youngest being 6 years, and the oldest being 66 years. Among the clinical types, 460 (63.36%) were of the segmental type. The average course of disease was  $8.43 \pm 7.35$  years. Before the operation, the stable period for vitiligo

ranged from 6 months to 40 years, and the longest stable period was 45 years. The largest single lesion area was 394 cm<sup>2</sup>. Among the 2118 pieces of skin lesions, the repigmentation of 1374 pieces (64.87%) was excellent, and 380 pieces (17.94%) were good, with a total effective rate of 82.81% (Fig.2). .

### **Correlation analysis of therapeutic effects with gender, age, disease type, lesion site, course of disease, and stable period**

Among the 2118 skin lesions, 998 were from men and 1120 from women (Fig.2). There was no difference in the efficacy rate between men and women (80.76% versus 84.64%). Age has a significant influence on patient repigmentation. The effective rate of patients aged 18 years and below was 90.20%, while that of patients aged over 40 years was only 62.25%. Different types of vitiligo have different rates of repigmentation. The effective rate of segmental vitiligo and scatter vitiligo (88.33%, 91.77%) was significantly higher than that of generalized vitiligo and acral vitiligo (70.3%, 71.02%). Different lesion sites affected the repigmentation rate in the ACEG. The effective rate in the foot and lower limbs was the highest (98.51% and 96.43%, respectively), while it was only 77.56% in the face. Among all lesion sites, the effective rates on the scalp and hand were the lowest (68.67% and 65.94%, respectively). There was no difference in the effective rate between over and less than 10 years of the disease course (82.01% versus 84.23%). However, the stable period of the disease had a marked impact on the repigmentation rate in ACEG. The effective rate of patients who were stable within one year was significantly lower than that of patients who were stable for more than three years (71.12% vs. 89.84%), and the effective rate of patients who were stable for 5–10 years was the highest (94.89%).

### **Adverse events**

In a total of 726 patients, 10 had scar hyperplasia, involving 24 skin lesions, especially in the chest, back, and upper limbs. Two patients developed infection in the lower limbs. One patient

with a severe case was hospitalized, and improved three days after cephalosporin injection.

Nine patients reported new leukoplakia after ACEG.

### **Comparison of skin cell composition before and after ACEG treatment**

scRNA-seq analysis demonstrated that the cell constitution between the lesion and repigmented skin was similar. More than 90% of the clusters in these two samples had a similar constitution, which indicated that ACEG cannot significantly change the cell composition of the epidermis (**S Fig.2&3**). As expected, the proportion of melanocytes showed a 50% increase in skin repigmentation compared with skin lesions. In keratinocyte clusters, the repigmentation sample showed a remarkable increase in the proportion of KRT6C+ keratinocytes compared to the sample from the lesions (2% versus 0.09%), which characterized by high expression of hair follicle outer root sheath-derived cell-related genes, such as KRT6C, KRT16, and KRT17(14), which may support melanocyte growth(15).We Also, cells secrete proteins that promote melanocyte proliferation and differentiation, including EDN1, FGF7, HGF and Laminin, are significant up-regulated in skinsheet. One year after ACEG, the proportions of these cells were significantly higher in the repigmented skin than in the skin lesions, which indicated that these cells might play important roles in repigmentation (Fig.4). These results were further verified by immunofluorescence (S Fig.4).

### **DISCUSSION**

Conventional ACEG cultivates human keratinocytes with mouse fibroblast feeders in fetal bovine serum-containing medium, which contains animal ingredients and might have potentially harmful effects (13, 16). To avoid the possible disadvantages of the conventional ACEG, we developed a modified ACEG method under serum-free and feeder-free conditions. Our previous study showed no significant difference in the rate of repigmentation between conventional and modified ACEG(17). We have performed a modified ACEG for over 1000 patients with vitiligo

since 2015. To obtain substantial evidence regarding the efficacy and safety of this technique for the treatment of refractory vitiligo, we conducted a real-world study with large-scale samples.

The efficacy rate of surgical intervention for vitiligo was previously determined according to the efficacy of a single patient(18). However, patients with vitiligo usually have more than one lesion that should be treated with ACEG. Different lesions in the same patient may have different effects. In this study, we analyzed the efficacy of ACEG in a single lesion instead of a single patient, and found that the total efficacy was similar to that of conventional surgical interventions (82.81% vs. 81.01%). Next, we demonstrated that the rate of repigmentation over 90% was 64.87%, which was higher than that of conventional surgical interventions (64.87% vs. 52.69%). Although there was no difference in the total effective rate between ACEG and conventional surgical interventions, ACEG might have advantages over conventional surgical interventions in terms of an excellent repigmentation rate.

We found that age significantly influenced repigmentation. For example, the effective rate in patients aged 18 years and below was 90.2%, while the effective rate in patients over 40 years old was only 62.25%. Young patients receiving ACEG might benefit more than older patients. Grafted stem cells should be young and devoid of senescent defects for regenerative purposes(19). It is highly possible that the cells from the donor epidermis of vitiligo patients aged over 40 years were senescent compared to those in vitiligo patients aged 18 years and below. Furthermore, we observed that different clinical types of vitiligo have different repigmentation rates. The efficacy rates of ACEG in segmental vitiligo and scatter vitiligo (88.33%, 91.77%) were considerably higher than those in generalized vitiligo and acral vitiligo (70.3%, 71.02%). This result regarding the influence of vitiligo type on the efficacy of ACEG is in line with that of conventional surgical techniques (9, 20-22). The location of skin lesions affects repigmentation(20, 23, 24).The effective rates in the foot and lower limbs were the highest (98.51% and 96.43%, respectively), while the effective rates in the scalp and finger were the lowest (68.67% and 65.94%, respectively). The finger frequently moves, and the blood supply to

the finger is relatively poor. Although the blood supply to the scalp is abundant, the epidermis sheet is not easily fixed in the scalp because of hair. These factors may affect the efficacy of ACEG. The stable period of vitiligo before ACEG treatment had a significant impact on remission rate. The effective treatment rate of patients who were stable within one year (71.12%) was considerably lower than that of patients who were stable for more than three years (89.84%). A longer stable period of skin lesions may create a more suitable microenvironment for melanocyte growth and repigmentation.

The classic mechanism of vitiligo with surgical intervention is the reconstruction of the affected melanocyte reservoir after transplantation(25). Our sc-RNA-seq analysis demonstrated that the number of melanocytes after ACEG increased by 50%. In addition, it has become a consensus that keratinocytes in vitiligo lesion have abnormal state, morphology, and function(26). They do not normally secrete cytokines, such as SCF and EDN1, which are important for the growth and function of melanocytes (27). The abnormal state of keratinocytes in vitiligo is difficult to recover after formation, which might cause failure of repigmentation in vitiligo(14). In this study, we found that there were many hair follicle outer root sheath-derived cells in ACE, and the number of HFORS in the repair sites 1 year after ACEG was still higher than that in the lesion skin, which may be related to wound repair (28).

The limitations of our study are related to its observational nature, and we cannot exclude bias owing to uncontrolled (residual) confounding. First, the indicators observed in this study were limited, and some factors affecting the study were not considered in the analysis, such as BMI and previous treatment regimens received by patients. Second, there was no direct comparison with other transplantation methods in this study, because blister transplantation is not suitable for the treatment of a large area of patients. In addition, other transplantation methods have not been approved by the Chinese Food and Drug Administration in China; thus, a good comparison in China cannot be obtained. Although based on literature review our efficiency is similar to that of other transplantation methods, the actual efficiency may be biased.

Owing to the high technical difficulty of the skin transplantation treatment method used in this study, most hospitals in China are not currently qualified to conduct this project; therefore, this study is a single-center study. Furthermore, we are trying to promote our treatment method and strive to conduct multicenter studies in the future. Meanwhile, the current price of tissue engineering transplantation is relatively high, and most patients who can afford this cost have a good economic foundation.

In particular, we confirmed the efficacy and safety of ACEG in a real-world study, and found that ACEG is effective and safe for treating refractory vitiligo. Patients with segmental vitiligo in the lower limbs, aged 18 years or below, and a stable period of > 3 years might be more suitable for ACEG. ACEG may reverse the abnormal keratinocyte state in the lesion area of vitiligo, thereby restoring the skin microenvironment suitable for melanocyte survival and repigmentation. Thus, ACEG is a promising therapeutic agent for refractory vitiligo.

## **MATERIALS AND METHODS**

### **Trial design**

We conducted a single-center retrospective study with a large sample size. This study was approved by the Ethics Committee of Huashan Hospital, Fudan University (KY2020-565), and registered with Chictr. org. cn (ChiCTR2100051405).

### **Participants**

The data of vitiligo patients treated with ACEG were collected from January 2015 to June 2019, and these patients completed 6 months of clinical follow-up after transplantation (**Fig. 5**). . In total, 790 patients were included in this study. Patient characteristics, such as sex, age, clinical type, lesion sites, course of the disease, and disease stable period, were recorded. Efficacy was determined by two dermatologists based on the follow-up photographs. Repigmentation was evaluated on the 6th month after surgery, and was graded as excellent



(90-100%), good ( $\geq 50\%$  and  $< 90\%$ ), fair ( $< 50\%$  and  $\geq 20\%$ ), and poor ( $< 20\%$ ). Repigmentation of over 50% was considered effective. Adverse reactions were also recorded.

### **Autologous Cultured Epithelium**

The donor skin was obtained as a full-thickness skin biopsy specimen (3-6 cm<sup>2</sup>) from a normally pigmented site, usually the groin. Skin tissue was digested with trypsin after thorough sterilization. Trypsinized epidermal cells were collected and cultured in clinical keratinocyte medium (CKM), that is, a xeno-free chemically defined medium containing IGF-1, KGF, bFGF,  $\alpha$ -MSH and 0.1 mM Ca<sup>2+</sup>. Clinically approved antibiotics gentamicin and erythromycin were added to prevent contamination.

After passaging, epidermal cells were cultured in CKM for three days, and then switched to keratinocyte growth medium KGM ( ReMed), which contains chemically defined ingredients and 1.4 mM Ca<sup>2+</sup> to promote the maturation of keratinocytes. After seven to ten days, the epidermal cells formed an autologous cultured epithelium (ACE). This epidermal sheet has a normal proportion of melanocytes, as proven by DOPA staining, and is ready for transplantation.

### **Transplantation of ACE**

Transplantation of ACE was performed as described in our previous published paper(17)

### **Sc-RNA seq Analysis**

For scRNA-seq analysis, we enrolled one patient who received ACEG treatment(**S Fig.1**). This study was approved by the Ethics Committee of the Huashan Hospital, Fudan University (KY2020-1137). Four different skin samples were obtained from the same patient: 1) donor skin: skin sample from the donor site, which was used for the generation of skin sheets; 2) skin sheets: autologous cultured epithelium derived from the donor skin; 3) Lesion skin: skin sample from skin lesions before transplantation; and 4) Repigmentation Skin: skin sample from the ACEG-treated site 1 year after surgery.

The single-cell suspension was prepared and loaded onto the 10X Chromium Single Cell Platform (10X Genomics) at a concentration of 1000 cells/ $\mu$ L (Single Cell 3 library and Gel Bead

Kit v.3), as described in the manufacturer's protocol. For each sample, 5000 cells were captured. Generation of gel beads in emulsion (GEMs), barcoding, GEM-RT cleanup, complementary DNA amplification, and library construction were performed according to the manufacturer's protocol. A Qubit was used for library quantification prior to pooling. The final library pool was sequenced on an Illumina Novaseq 6000 instrument using 150-base-paired-end reads. Scrublet (version Python 3.7.3) and Cellranger (version 4.0.0) were used to generate clean data. Seurat (3.2.0) was used to analyze the subcluster and marker genes. The trajectory was analyzed using Monocle2 (2.12.0). Gene Ontology (GO) enrichment and KEGG analyses of differentially expressed genes were performed using the clusterProfiler R package with gene length bias correction. Ingenuity Pathway Analysis (IPA) analysis was conducted at Fudan University.

### **Statistical analysis**

Continuous variables were presented as mean (standard deviation) or median (interquartile range), and categorical variables were described as frequencies and percentages. The 95% confidence intervals (CIs) of the repigmentation and efficiency rates were calculated using the Wald asymptotic confidence limits. The results of the subgroups are presented as forest plots. The pre-specified subgroups included sex (female and male), age ( $\leq 18$ , 18–40, and  $\geq 40$  years), clinical type (generalized, segmental, scatter, and acro-facial), lesion type (scalp, face, neck, trunk, arm, leg, hand, and foot), course of the disease ( $< 10$  and  $\geq 10$ ), and disease stable period ( $< 1$ , 1–3, 3–5, 5–10, and  $\geq 10$ ).

The generalized linear mixed model was used to explore the potential association between the clinical characteristics and repigmentation rate. Models were constructed with age, sex, clinical type, course, and lesion site as fixed factors, and subject (intercept) as random factors.

All hypothesis tests were two-sided, and p values  $< 0.05$  were considered statistically significant. All data were analyzed using SAS software (version 9.4) and R software (version 4.1.1).

## References

1. K. Ezzedine, V. Eleftheriadou, M. Whitton, N. van Geel, Vitiligo. *Lancet* **386**, 74-84 (2015).
2. K. Hedayat *et al.*, Quality of life in patients with vitiligo: a cross-sectional study based on Vitiligo Quality of Life index (VitiQoL). *Health Qual Life Outcomes* **14**, 86 (2016).
3. N. Talsania, B. Lamb, A. Bewley, Vitiligo is more than skin deep: a survey of members of the Vitiligo Society. *Clin Exp Dermatol* **35**, 736-739 (2010).
4. A. B. Dillon, A. Sideris, A. Hadi, N. Elbuluk, Advances in Vitiligo: An Update on Medical and Surgical Treatments. *J Clin Aesthet Dermatol* **10**, 15-28 (2017).
5. T. F. Mohammad, I. H. Hamzavi, Surgical Therapies for Vitiligo. *Dermatol Clin* **35**, 193-203 (2017).
6. S. Gupta, V. K. Jain, P. K. Saraswat, Suction blister epidermal grafting versus punch skin grafting in recalcitrant and stable vitiligo. *Dermatol Surg* **25**, 955-958 (1999).
7. C. Acikel, E. Ulkur, B. Celikoz, Carbon dioxide laser resurfacing and thin skin grafting in the treatment of "stable and recalcitrant" vitiligo. *Plast Reconstr Surg* **111**, 1291-1298 (2003).
8. C. Singh, D. Parsad, A. J. Kanwar, S. Dogra, R. Kumar, Comparison between autologous noncultured extracted hair follicle outer root sheath cell suspension and autologous noncultured epidermal cell suspension in the treatment of stable vitiligo: a randomized study. *Br J Dermatol* **169**, 287-293 (2013).
9. H. J. Ju *et al.*, Surgical Interventions for Patients With Vitiligo: A Systematic Review and Meta-analysis. *JAMA Dermatol* **157**, 307-316 (2021).
10. N. Khunger, S. D. Kathuria, V. Ramesh, Tissue grafts in vitiligo surgery - past, present, and future. *Indian J Dermatol* **54**, 150-158 (2009).
11. J. G. Rheinwald, H. Green, Serial cultivation of strains of human epidermal keratinocytes: the formation of keratinizing colonies from single cells. *Cell* **6**, 331-343 (1975).
12. K. Matsuzaki, N. Kumagai, Treatment of vitiligo with autologous cultured keratinocytes in 27 cases. *Eur J Plast Surg* **36**, 651-656 (2013).
13. N. A. Coolen *et al.*, Culture of keratinocytes for transplantation without the need of feeder layer cells. *Cell Transplant* **16**, 649-661 (2007).
14. E. Bastonini *et al.*, Involvement of non-melanocytic skin cells in vitiligo. *Exp Dermatol* **28**, 667-673 (2019).
15. A. Slominski *et al.*, Hair follicle pigmentation. *J Invest Dermatol* **124**, 13-21 (2005).
16. P. De Corte *et al.*, Feeder layer- and animal product-free culture of neonatal foreskin keratinocytes: improved performance, usability, quality and safety. *Cell Tissue Bank* **13**, 175-189 (2012).
17. J. Li, S. Chen, T. Uyama, W. Wu, J. Xu, Clinical Application of Cultured Stratified Epithelial Sheets Grown Under Feeder or Feeder-Free Conditions for Stable Vitiligo. *Dermatol Surg* **45**, 497-505 (2019).
18. S. Sharma, V. K. Garg, R. Sarkar, V. Relhan, Comparative study of flip-top transplantation and punch grafting in stable vitiligo. *Dermatol Surg* **39**, 1376-1384 (2013).
19. P. Rožman, The potential of non-myeloablative heterochronous autologous hematopoietic stem cell transplantation for extending a healthy life span. *Geroscience* **40**, 221-242 (2018).
20. A. P. Holla *et al.*, Acral vitiligo and lesions over joints treated with non-cultured epidermal cell suspension transplantation. *Clin Exp Dermatol* **38**, 332-337 (2013).
21. Y. M. Tawfik, N. E. Abd Elazim, A. A. Abdel-Motaleb, R. A. A. Mohammed, A. M. A. Tohamy, The effect of NB-UVB on noncultured melanocyte and keratinocyte transplantation in treatment of generalized vitiligo using two different donor-to-recipient ratios. *J Cosmet Dermatol* **18**, 638-646 (2019).
22. R. Sarkar, S. D. Mehta, A. J. Kanwar, Repigmentation after autologous miniature punch grafting in segmental vitiligo in North Indian patients. *J Dermatol* **28**, 540-546 (2001).
23. H. A. Al-Shobaili, Correlation of clinical efficacy and psychosocial impact on vitiligo patients by excimer laser treatment. *Ann Saudi Med* **34**, 115-121 (2014).
24. N. van Geel, B. K. Goh, E. Wallaey, S. De Keyser, J. Lambert, A Review of Non-cultured Epidermal Cellular Grafting in Vitiligo. *J Cutan Aesthet Surg* **4**, 17-22 (2011).
25. S. V. Mulekar, P. Isedeh, Surgical interventions for vitiligo: an evidence-based review. *Br J Dermatol* **169** Suppl 3, 57-66 (2013).
26. A. Y. Lee, Role of keratinocytes in the development of vitiligo. *Ann Dermatol* **24**, 115-125 (2012).

27. A. Y. Lee, N. H. Kim, W. I. Choi, Y. H. Youm, Less keratinocyte-derived factors related to more keratinocyte apoptosis in depigmented than normally pigmented suction-blistered epidermis may cause passive melanocyte death in vitiligo. *J Invest Dermatol* **124**, 976-983 (2005).
28. A. G. Ziemann, P. A. Coulombe, Pathophysiology of pachyonychia congenita-associated palmoplantar keratoderma: new insights into skin epithelial homeostasis and avenues for treatment. *Br J Dermatol* **182**, 564-573 (2020).

### **Abbreviation and acronym list**

|                  |                                         |
|------------------|-----------------------------------------|
| <b>ACEG</b>      | autologous cultured epithelium grafting |
| <b>QOL</b>       | quality of life                         |
| <b>SBEG</b>      | suction blister epidermal grafting      |
| <b>CECS</b>      | cultured epidermal cell suspension      |
| <b>NCES</b>      | noncultured epidermal cell suspension   |
| <b>NCFC</b>      | noncultured follicular cell suspension  |
| <b>scRNA-seq</b> | single-cell RNA sequencing              |
| <b>CKM</b>       | clinical keratinocyte medium            |
| <b>KGM</b>       | keratinocyte growth medium              |
| <b>ACE</b>       | autologous cultured epithelium          |
| <b>CIs</b>       | confidence intervals                    |
| <b>KRT</b>       | keratin                                 |
| <b>HGF</b>       | Hepatocyte growth factor                |
| <b>FGF</b>       | Fibroblast Growth Factor                |
| <b>SCF</b>       | Stem Cell Factor                        |
| <b>EDN</b>       | Endothelin                              |
| <b>HFORS</b>     | hair follicle outer root sheath         |
| <b>BMI</b>       | Body Mass Index                         |
| <b>LAMB3</b>     | Laminin subunit beta-3                  |

## **FIGURE LEGENDS**

**Fig.1 Patient characteristics.**

**Fig.2 Therapeutic effects of ACEG and correlation analysis with different clinical factors.** The correlation analysis of therapeutic effects with gender, age, disease type, lesion site, course of disease, and stable period.

**Fig.3 sc-RNA seq analysis of vitiligo skin samples.** The proportion of different cell clusters in four skin samples. normal, normal skin sample from the groin; vitiligo, depigment skin lesion from the patient; repigmentation, same site repigment one year after the ACEG treatment; skinsheet, ACE made from normal skin.

**Fig.4 Trial profile.**

## **SUPPLEMENT FIGURE LEGENDS**

**S Fig.1 The basic information of vitiligo patient in scRNA-Seq.** One year after the ACEG treatment, the lesion is recovered

**S Fig.2 scRNA-seq results. a,** tSNE clustering results of 4 skin samples. A lesion skin, B repigmentation skin, C skin sheet, D donor skin.**b,** the cell composition of 4 different skin samples. A lesion skin, B repigmentation skin, C skin sheet, D donor skin

**S Fig.3 heatmap of major marker genes in scRNA-seq**

**S Fig.4 Immunostain results of major marker genes in scRNA-seq**

**Acknowledgments:**

**Funding:**

National Natural Science Foundation of China (82073465).  
Shanghai Science and Technology Municipality (21140900800).  
Shanghai Science and Technology Municipality (20DZ2202200).

**Author contributions:**

Conceptualization: JX, JL

Methodology: JX, XZ, JL, SC, LT, JW, JLS, EH, TU, FW

Investigation: JL, SC, XZ, WL, HL, JW

Visualization: XZ, JL, ML

Funding acquisition: JL, JX

Project administration: JX, JW, XZ

Supervision: JX, JW, JL

Writing – original draft: JL, JW, XZ, LT, QZ

Writing – review & editing: JX, JW

**Competing interests:** No competing interests was related to this article.

**Data and materials availability:** The gene sequencing data in this article has been deposited to <https://www.ncbi.nlm.nih.gov/> as SRR18079681, SRR18079680, SRR18079679, SRR18079678. All data, codes, and materials in the analysis can be provided to any researcher for purposes of reproducing or extending the analysis by contact with the correspondence author too. All data, codes, and materials used in the analysis must be available in some form to any researcher for purposes of reproducing or extending the analysis. Include a note explaining any restrictions on materials, such as materials transfer agreements (MTAs). Note accession numbers to any data relating to the paper and deposited in a public database; include a brief description of the dataset or model with the number. If all data are in the paper and supplementary materials, include the sentence “All data are available in the main text or the supplementary materials.”

**Conflicts of Interest:** Nonedeclared.

**Research ethics and patient consent:** IRB approval status: Reviewed and approved by Huashan hospital Fudan University; approval KY2020-565. Registered with Chict.org.cn (ChiCTR2100051405).





| Characteristics                      | Values      |
|--------------------------------------|-------------|
| N                                    | 726         |
| age                                  |             |
| mean±sd                              | 23.56(9.50) |
| median(Q1,Q3)                        | 23(17,28)   |
| gender                               |             |
| male                                 | 347(47.80)  |
| female                               | 379(52.20)  |
| clinical type                        |             |
| Generalized                          | 33(4.55)    |
| Segmental                            | 460(63.36)  |
| Scatter                              | 85(11.71)   |
| Acro-facial                          | 148(20.39)  |
| course of disease                    |             |
| mean±sd                              | 8.43(7.35)  |
| median(Q1,Q3)                        | 6(3,12)     |
| Stable period                        |             |
| mean±sd                              | 3.97(5.33)  |
| median(Q1,Q3)                        | 2(1,5)      |
| Affected area (BSA)                  |             |
| mean±sd                              | 7.00(8.20)  |
| median(Q1,Q3)                        | 4(2,8)      |
| Number of lesions                    | 2118        |
| Average number of lesions per person | 2.92        |
| surgical sites                       |             |
| scalp                                | 83(3.92)    |
| face                                 | 459(21.67)  |
| neck                                 | 230(10.86)  |
| trunk                                | 518(24.46)  |
| arm                                  | 142(6.70)   |
| leg                                  | 252(11.90)  |
| hands                                | 367(17.33)  |
| feet                                 | 67(3.16)    |

| Subgroups           | N    | excellent (90-100%) | good (≥50) | t-value | P-value |       |        |
|---------------------|------|---------------------|------------|---------|---------|-------|--------|
| Total               | 2118 | 1374                | 64.87%     | 1754    | 82.81%  |       |        |
| Gender              |      |                     |            |         |         |       |        |
| Male                | 998  | 632                 | 63.33%     | 806     | 80.76%  | 0.03  | 0.9767 |
| Female              | 1120 | 742                 | 66.25%     | 948     | 84.64%  | ref.  |        |
| Age(yrs.)           |      |                     |            |         |         |       |        |
| ≤18                 | 612  | 443                 | 72.39%     | 552     | 90.20%  |       |        |
| 18~40               | 1355 | 876                 | 64.65%     | 1108    | 81.77%  |       |        |
| ≥40                 | 151  | 55                  | 36.42%     | 94      | 62.25%  |       |        |
| Clinical type       |      |                     |            |         |         |       |        |
| Generalized         | 101  | 52                  | 51.49%     | 71      | 70.30%  | 0.3   | 0.7657 |
| Segmental           | 1054 | 731                 | 69.36%     | 931     | 88.33%  | 5.25  | <.0001 |
| Scatter             | 328  | 260                 | 79.27%     | 301     | 91.77%  | 4.83  | <.0001 |
| Acro-facial         | 635  | 331                 | 52.13%     | 451     | 71.02%  | ref.  |        |
| Lesion site         |      |                     |            |         |         |       |        |
| Scalp               | 83   | 31                  | 37.35%     | 57      | 68.67%  | -6.04 | <.0001 |
| Face                | 459  | 270                 | 58.82%     | 356     | 77.56%  | -5.19 | <.0001 |
| Neck                | 230  | 162                 | 70.44%     | 204     | 88.70%  | -0.45 | 0.6506 |
| Arm                 | 142  | 97                  | 68.31%     | 122     | 85.92%  | 1.78  | 0.0759 |
| Leg                 | 252  | 219                 | 86.91%     | 243     | 96.43%  | 3.43  | 0.0006 |
| Hand                | 367  | 167                 | 45.50%     | 242     | 65.94%  | 0.97  | 0.3326 |
| Foot                | 134  | 57                  | 85.08%     | 66      | 98.51%  | 3.1   | 0.002  |
| Trunk               | 518  | 371                 | 71.62%     | 464     | 89.58%  | ref.  | .      |
| Course(yrs.)        |      |                     |            |         |         |       |        |
| <10                 | 1351 | 859                 | 63.58%     | 1108    | 82.01%  | -2.54 | 0.0112 |
| >=10                | 767  | 515                 | 67.15%     | 646     | 84.23%  | ref.  |        |
| Stable period(yrs.) |      |                     |            |         |         |       |        |
| <1                  | 232  | 127                 | 54.74%     | 165     | 71.12%  | -4.1  | <.0001 |
| 1~3                 | 1059 | 621                 | 58.64%     | 826     | 78.00%  | -2.9  | 0.0038 |
| 3~5                 | 315  | 234                 | 74.29%     | 283     | 89.84%  | -0.63 | 0.5295 |
| 5~10                | 313  | 242                 | 77.32%     | 297     | 94.89%  | -0.01 | 0.9957 |
| ≥10                 | 199  | 150                 | 75.38%     | 183     | 91.96%  | ref.  | .      |

medRxiv preprint doi: <https://doi.org/10.1101/2022.12.18.22283394>; this version posted December 20, 2022. The copyright holder for this preprint (which was not certified by peer review) is the author/funder, who has granted medRxiv a license to display the preprint in perpetuity. All rights reserved. No reuse allowed without permission.

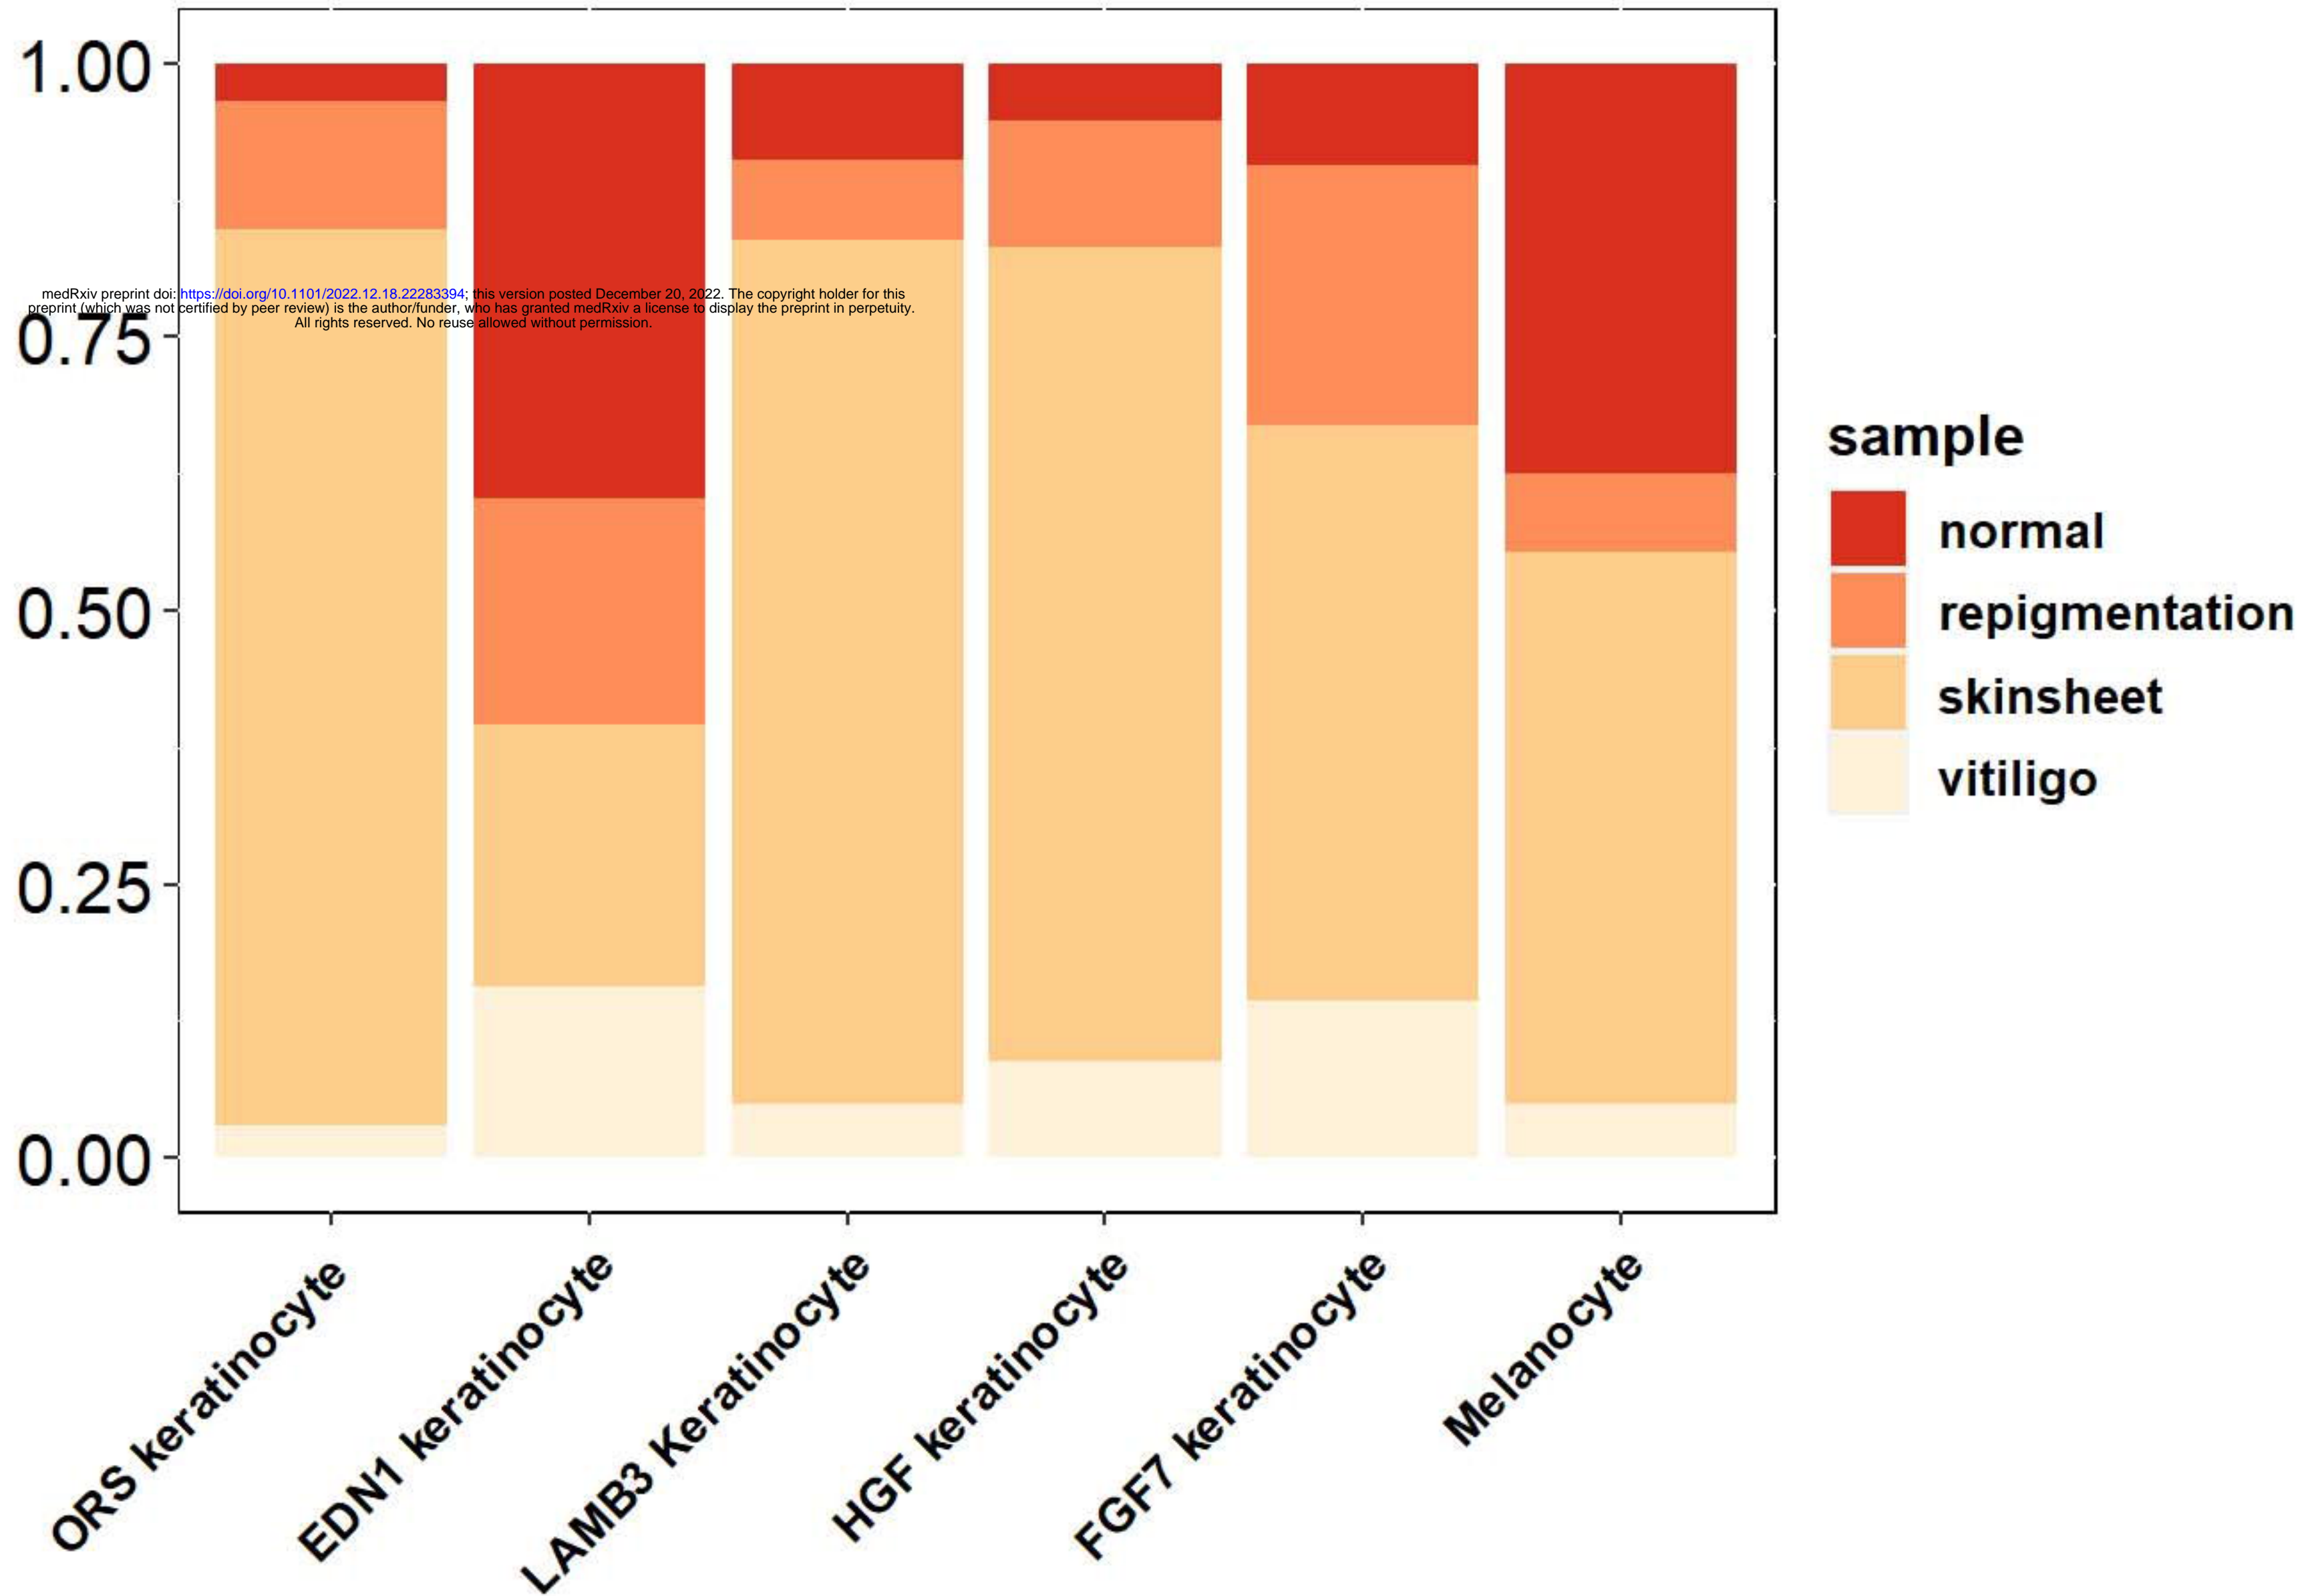

Vitiligo Patients treated with ACEG from January 1, 2015 to August 31, 2019 (n=790)

**Exclude**

- clinical data were incomplete and the patient cannot be contacted (n=45)

Vitiligo patients underwent transplantation, evaluated according to clinical data (n=745)

Two dermatologists independently evaluated the patient's follow-up photos (n=745)

**Lost to follow up**

- Lack of follow-up photos (n=18)
- Photo quality cannot be evaluated (n=1)

Analyzed (n=726)

- 2118 lesions of the 726 patients

medRxiv preprint doi: <https://doi.org/10.1101/2022.12.18.22283394>; this version posted December 20, 2022. The copyright holder for this preprint (which was not certified by peer review) is the author/funder, who has granted medRxiv a license to display the preprint in perpetuity. All rights reserved. No reuse allowed without permission.

## Patients information

Gender female

BMI 21

Smoke/Alcohol no

medRxiv preprint doi: <https://doi.org/10.1101/2022.12.18.22283394>; this version posted December 20, 2022. The copyright holder for this preprint (which was not certified by peer review) is the author/funder, who has granted medRxiv a license to display the preprint in perpetuity. All rights reserved. No reuse allowed without permission.

other chronic disease no

Classification of vitiligo Vulgaris

Duration of disease 20 years

other skin Disease no

Stability time (months), mean  
 $\pm$ SD (median; range) 10 years

Total lesion % 2%

transplantation site leg

Treated area surface (cm<sup>2</sup>),  
mean  $\pm$ SD (median) 2%

Family history of vitiligo no

## The information of the skin sheet

K:M Ratio 25

Donor site groin

Follow-up period 1 year

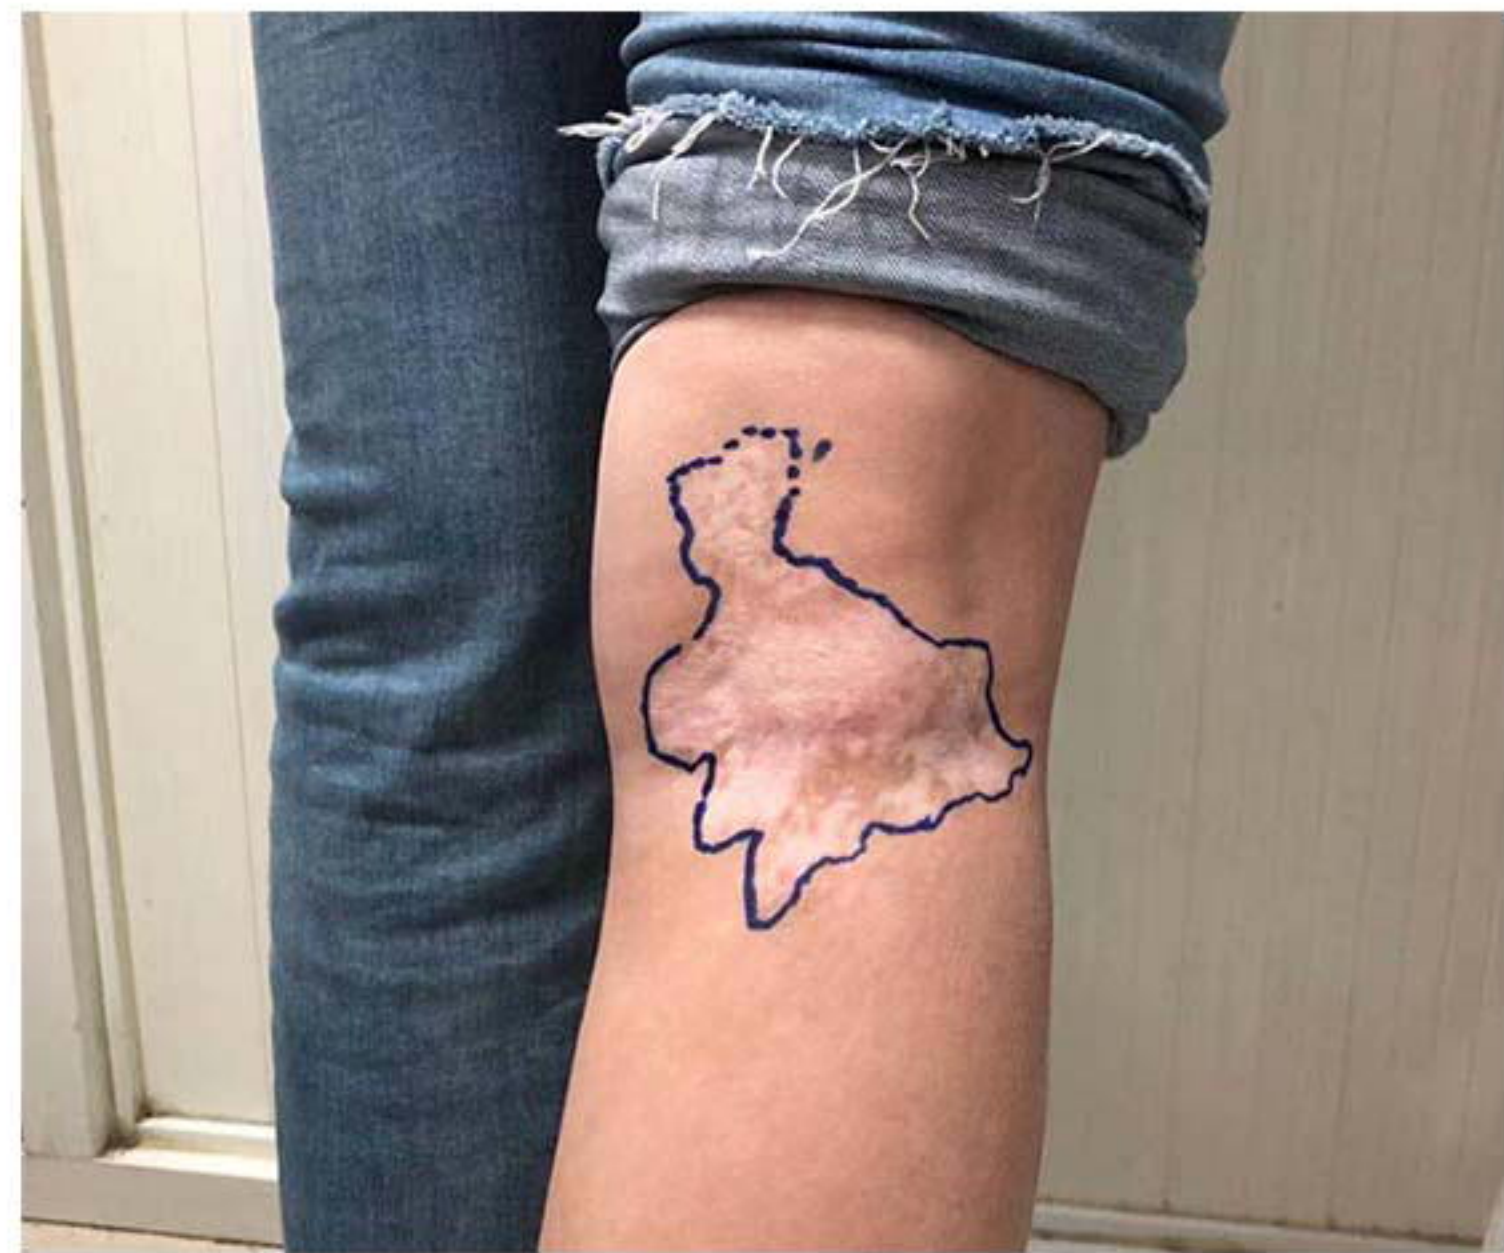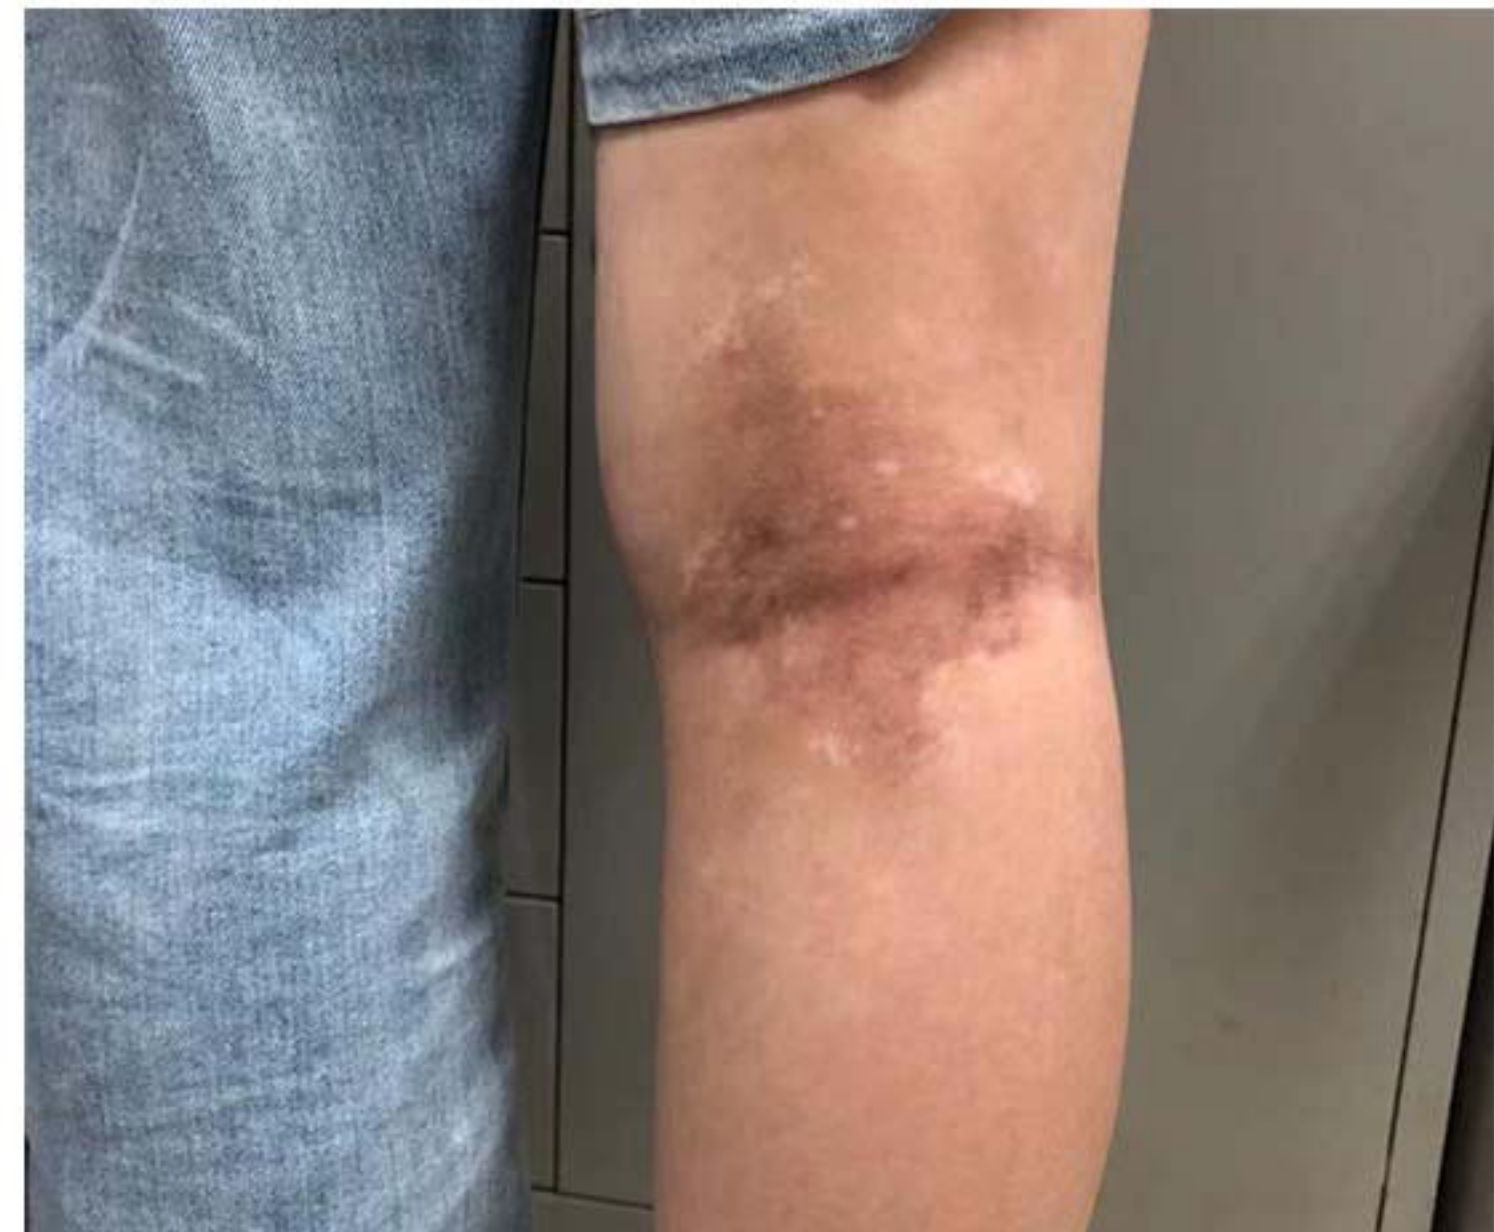

**a**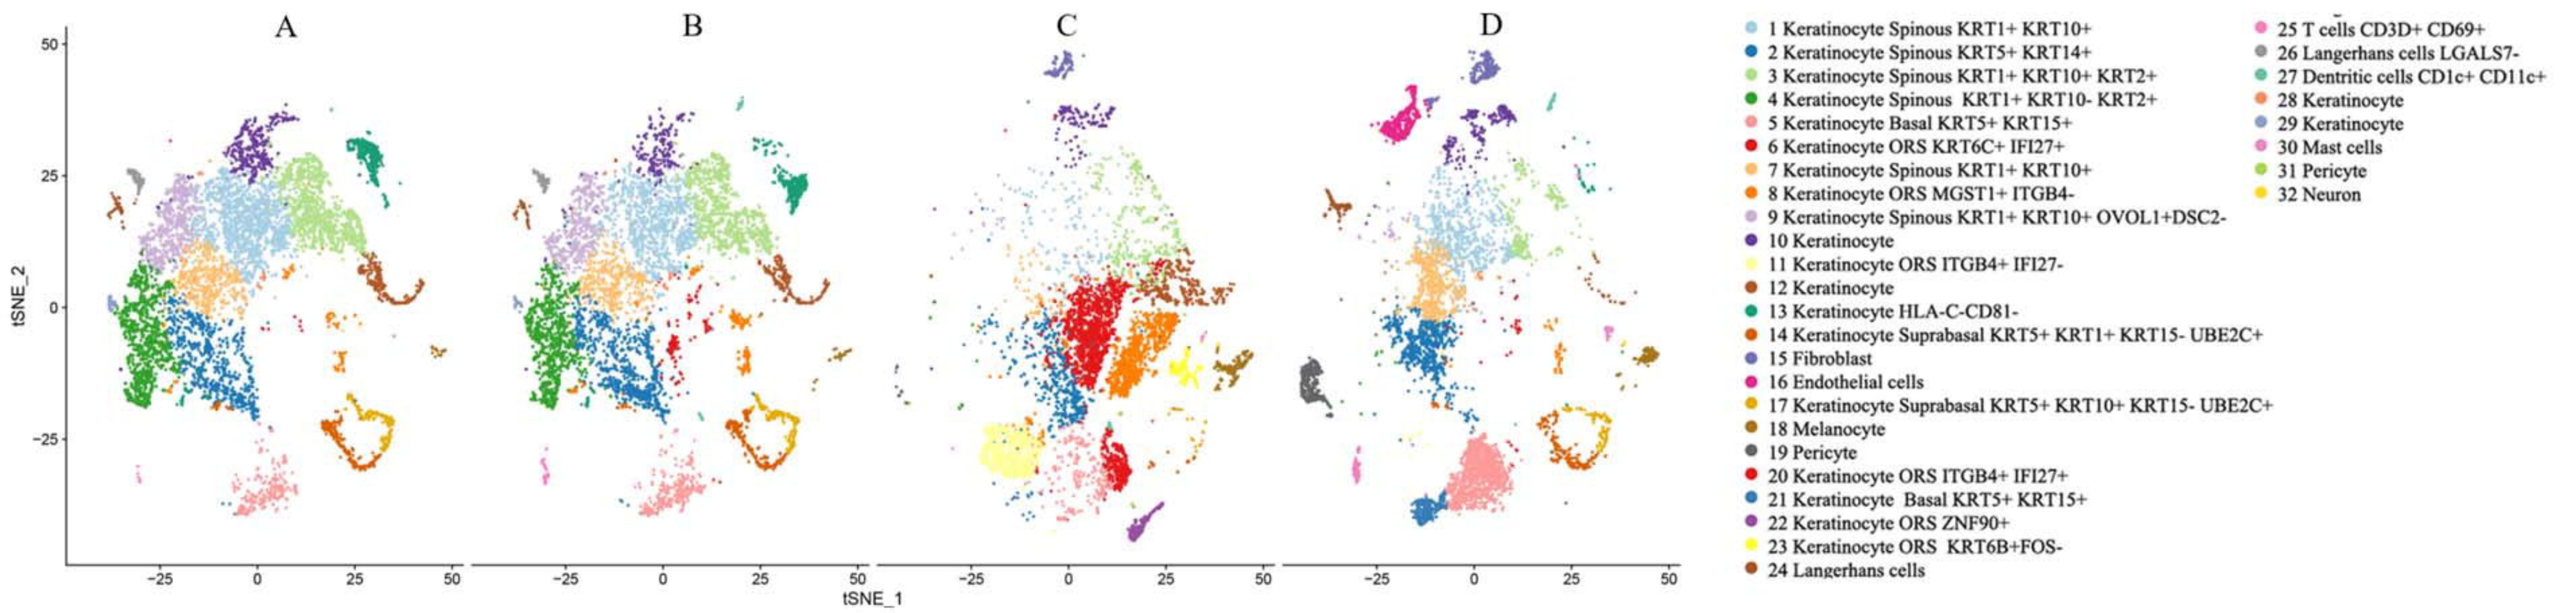

**a, tSNE clustering results of 4 skin samples. A lesion skin, B repigmentation skin, C skin sheet, D donor skin.**

**b**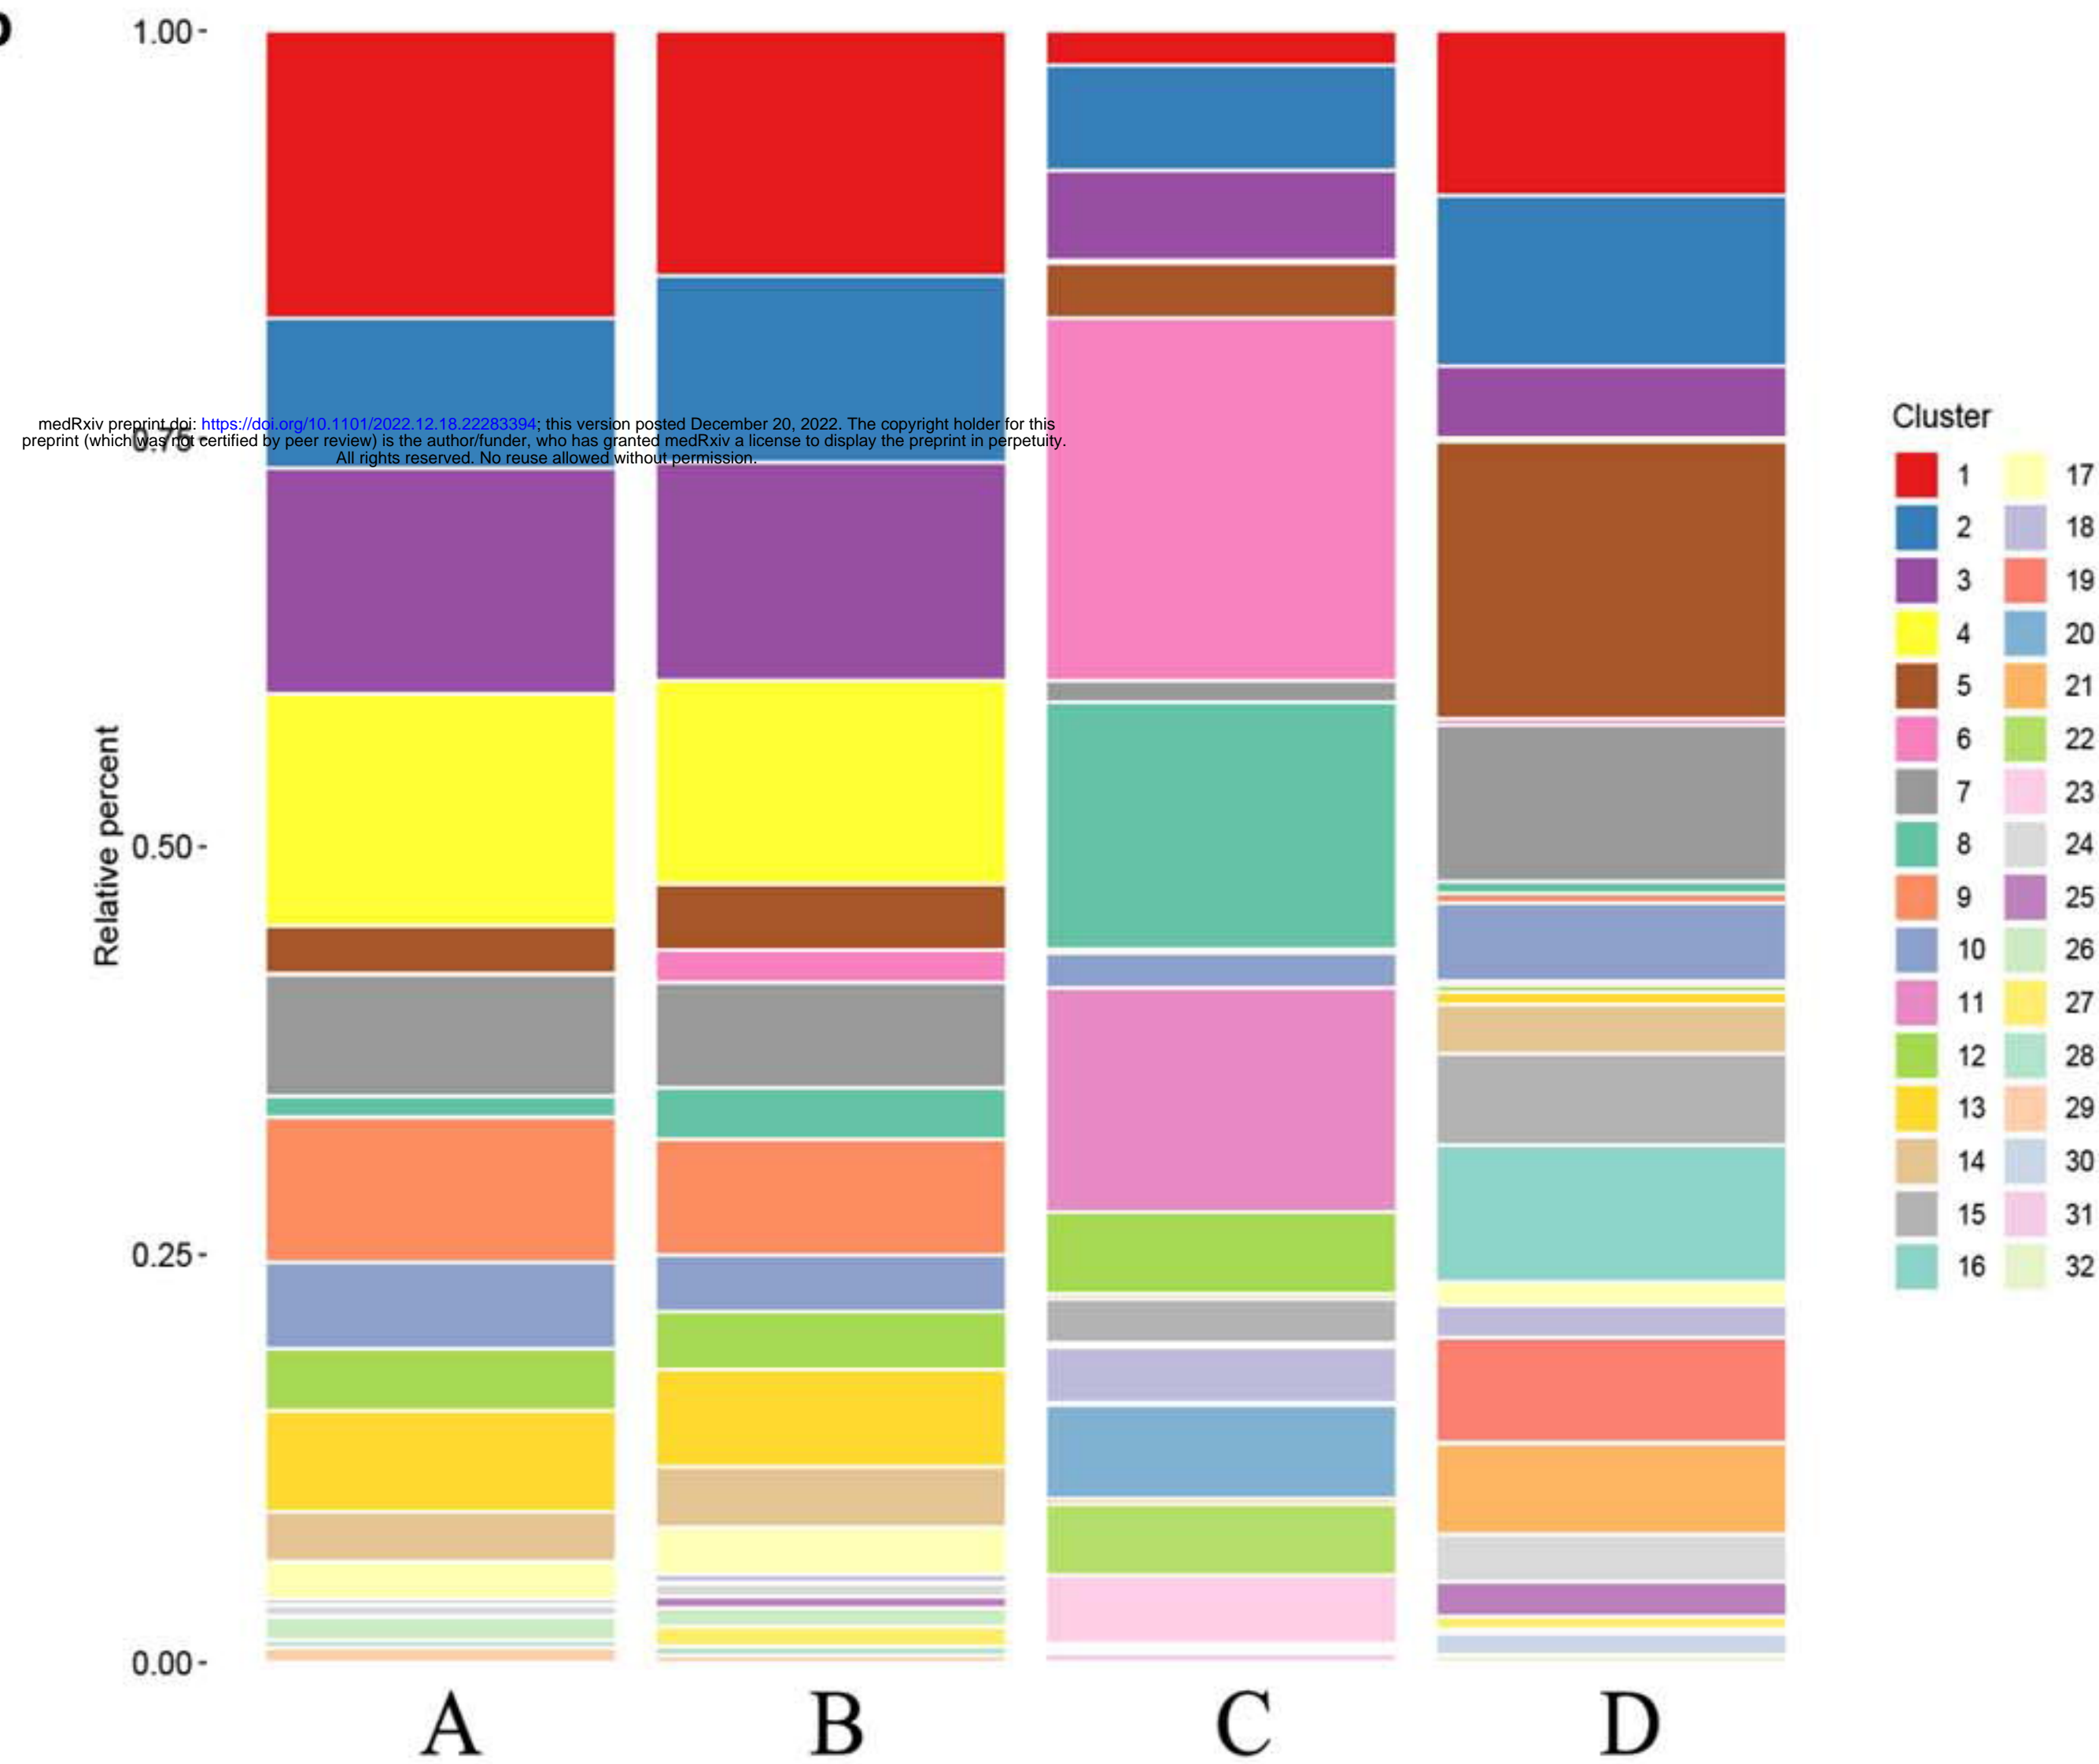

**b, the cell composition of 4 different skin samples. A lesion skin, B repigmentation skin, C skin sheet, D donor skin.**

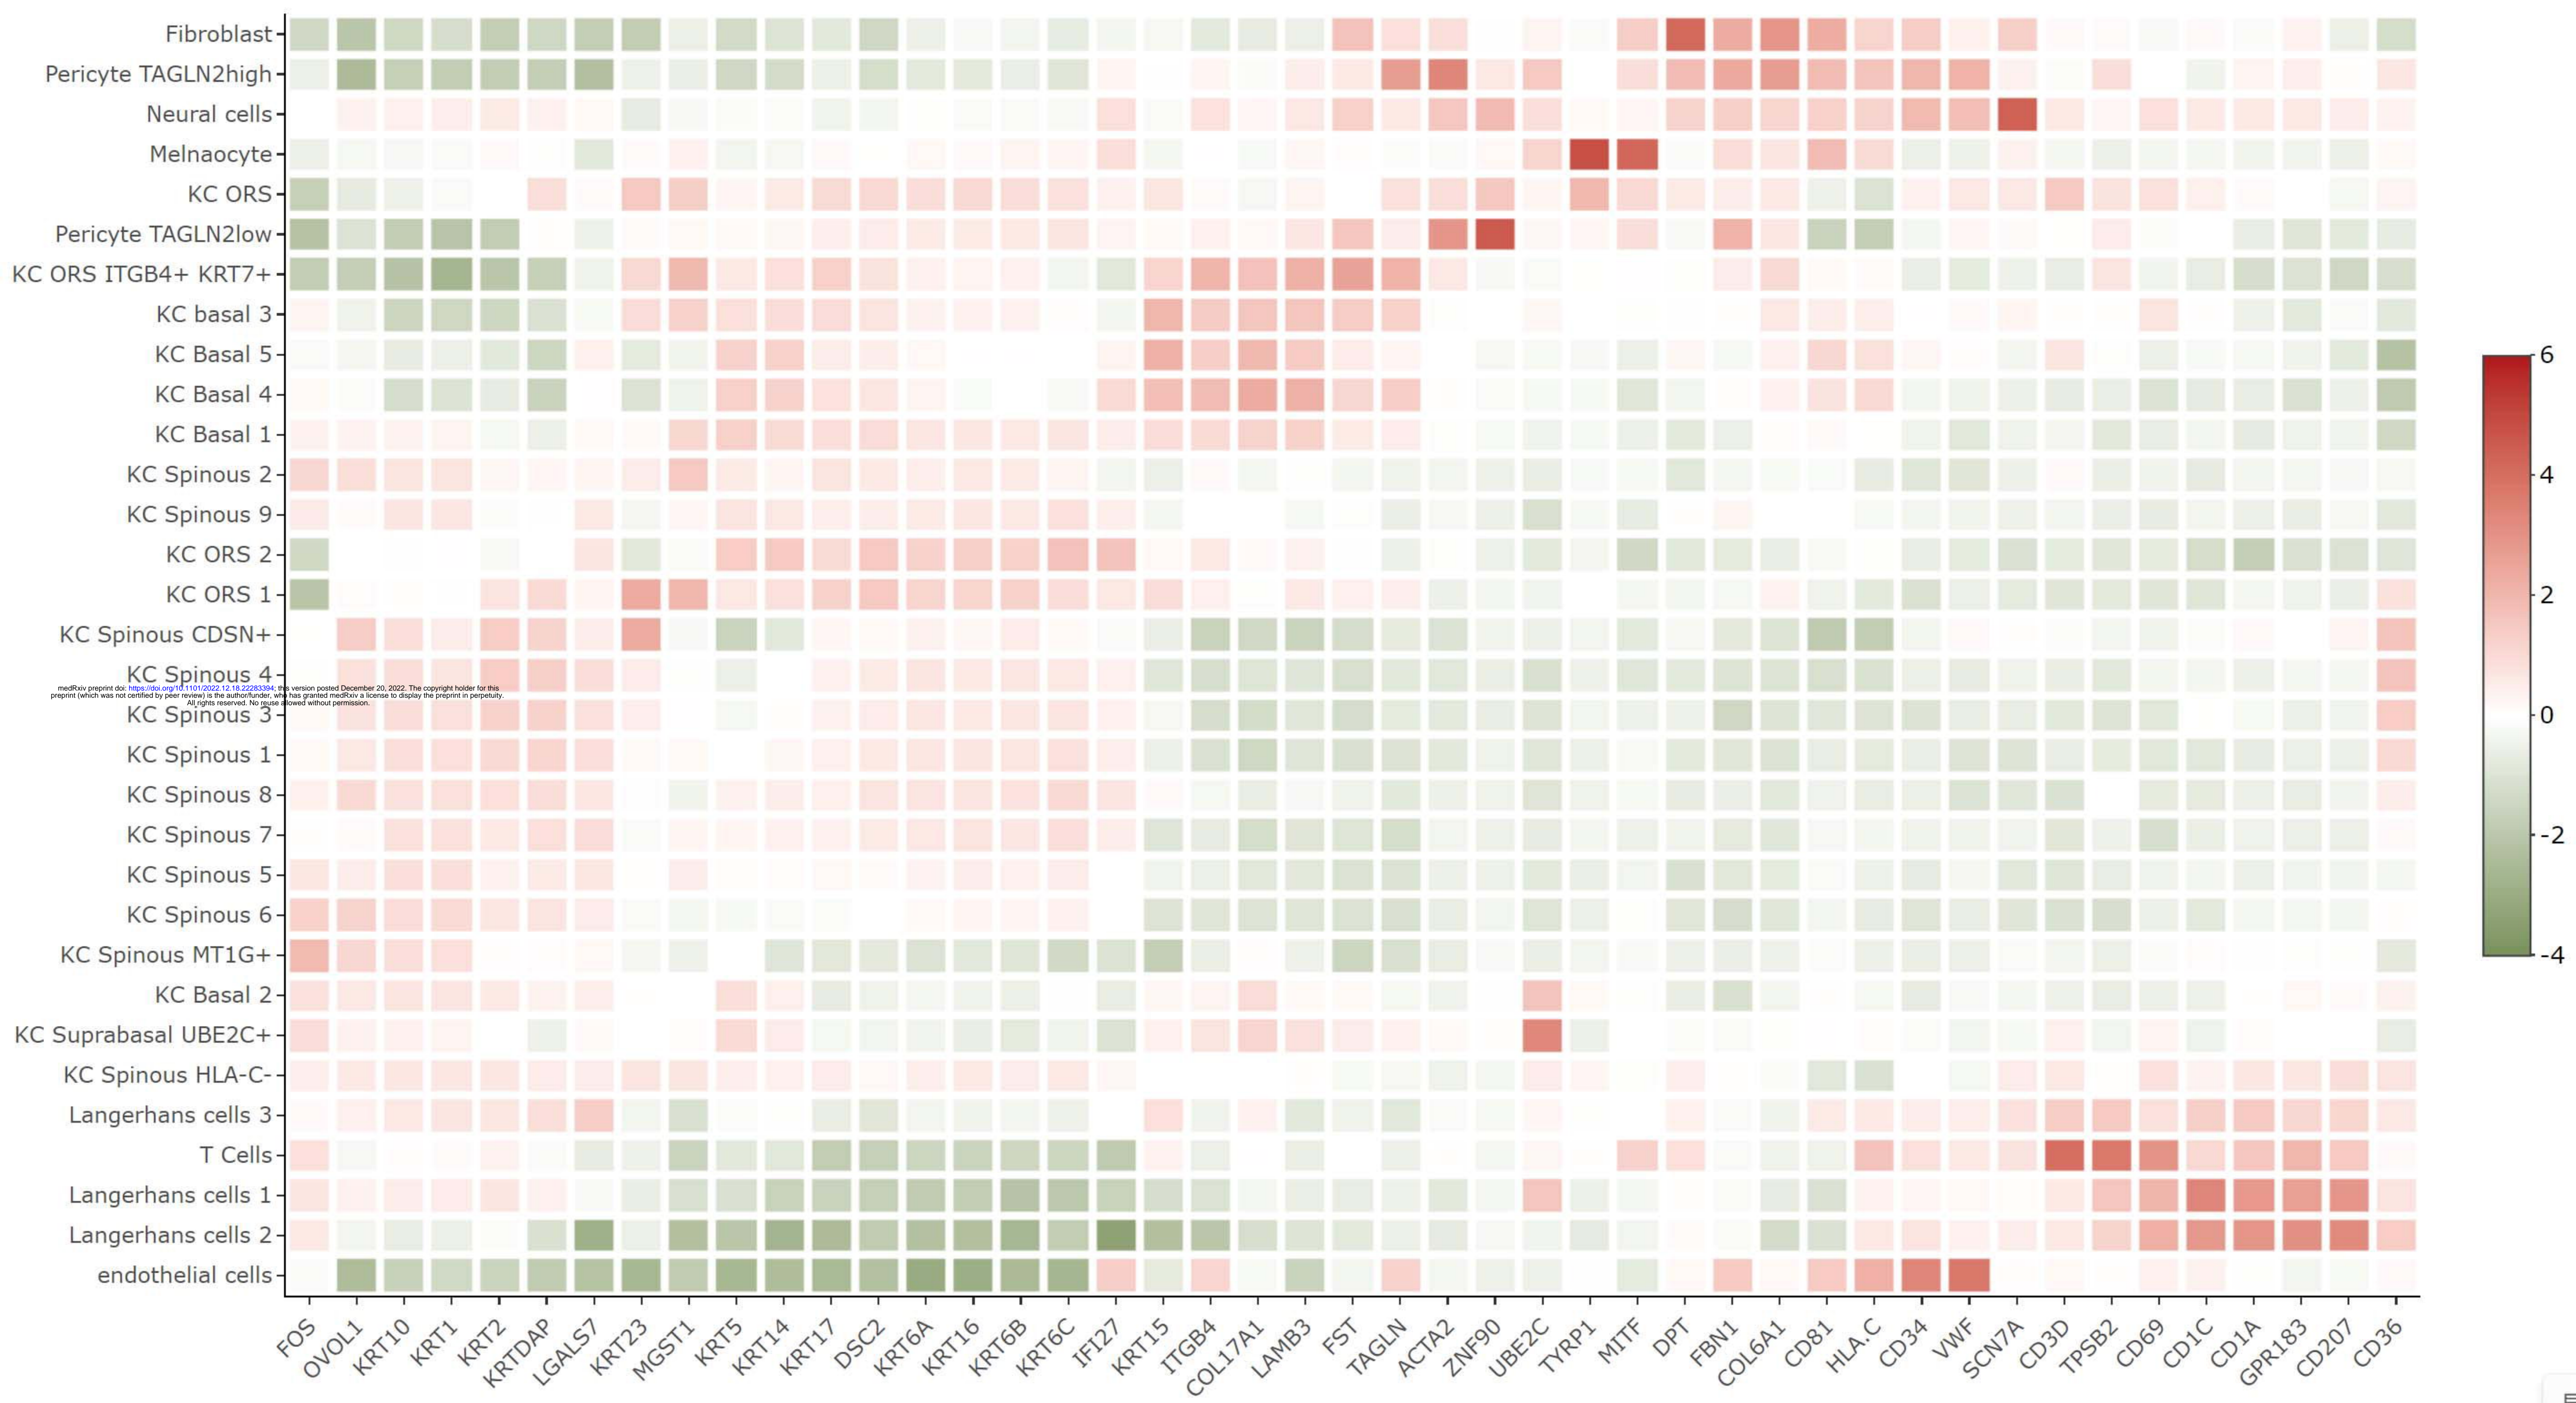

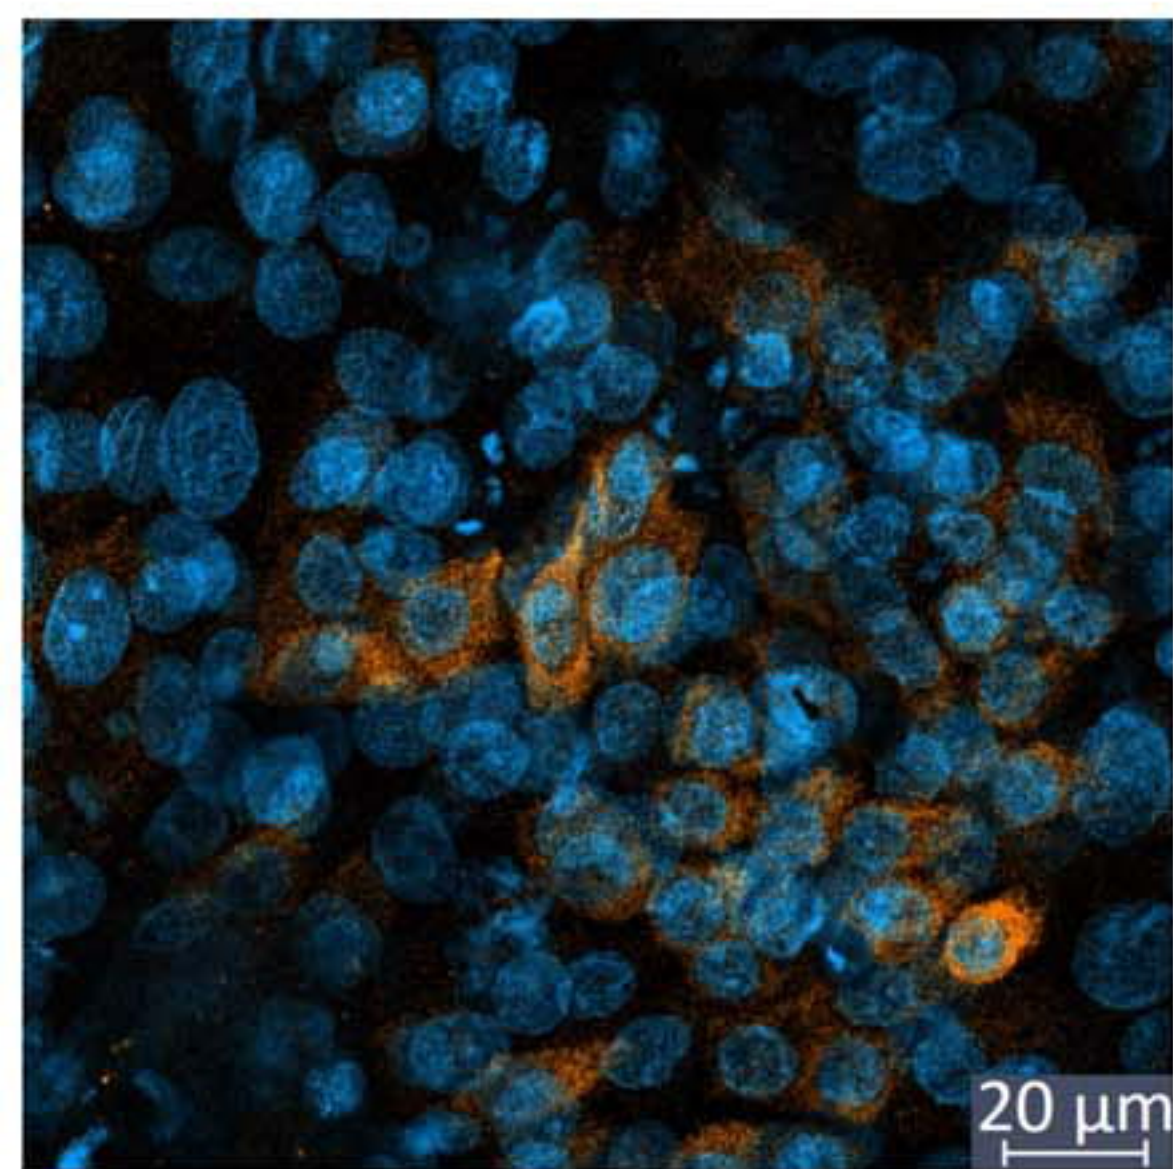

**KRT15 X400**

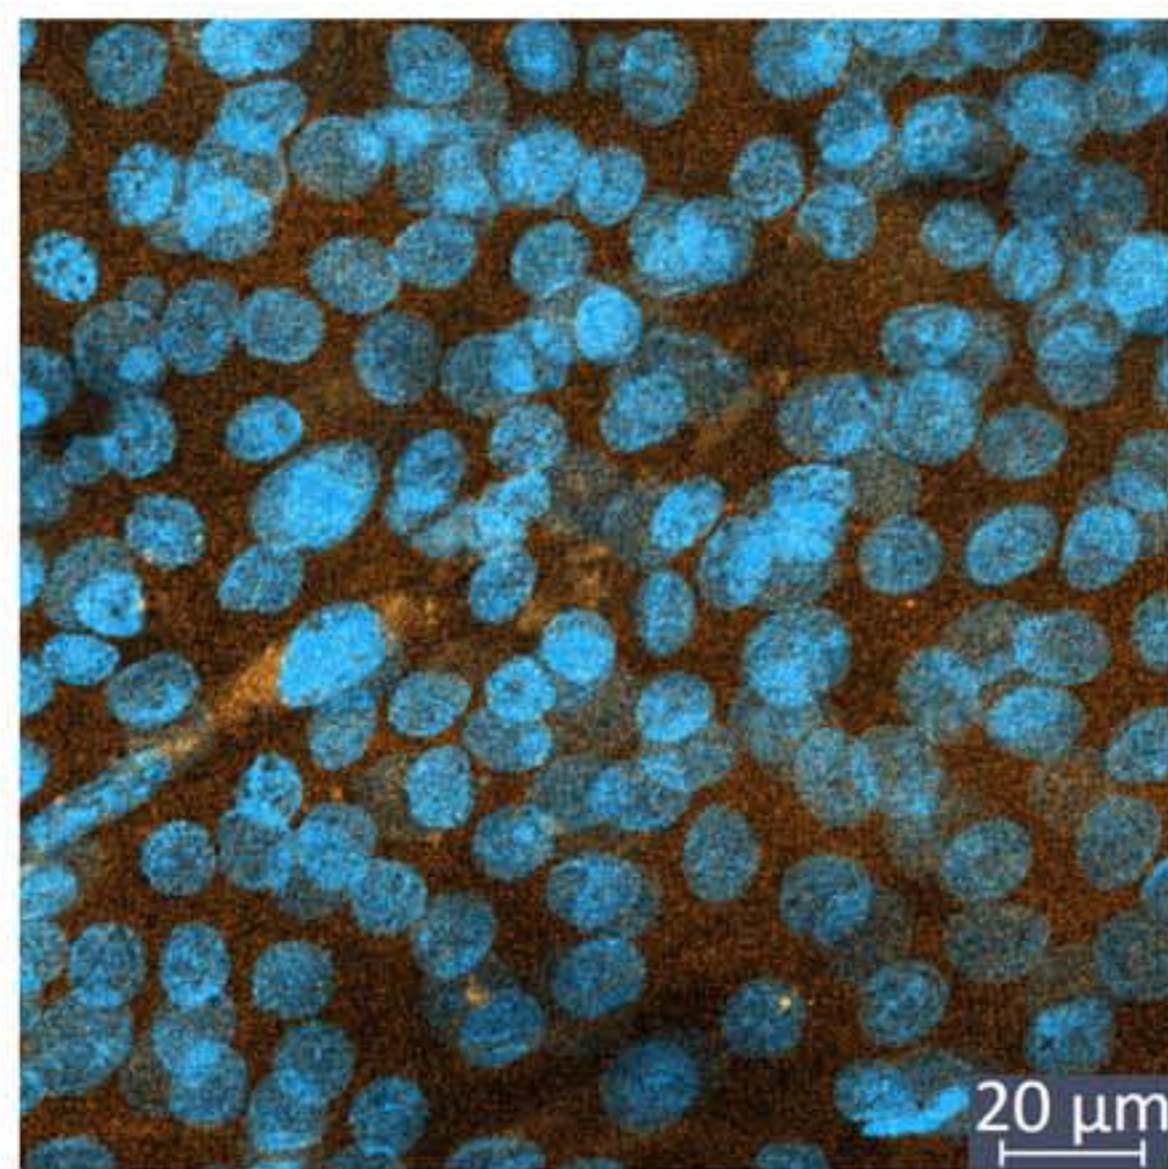

**CD200 X400**

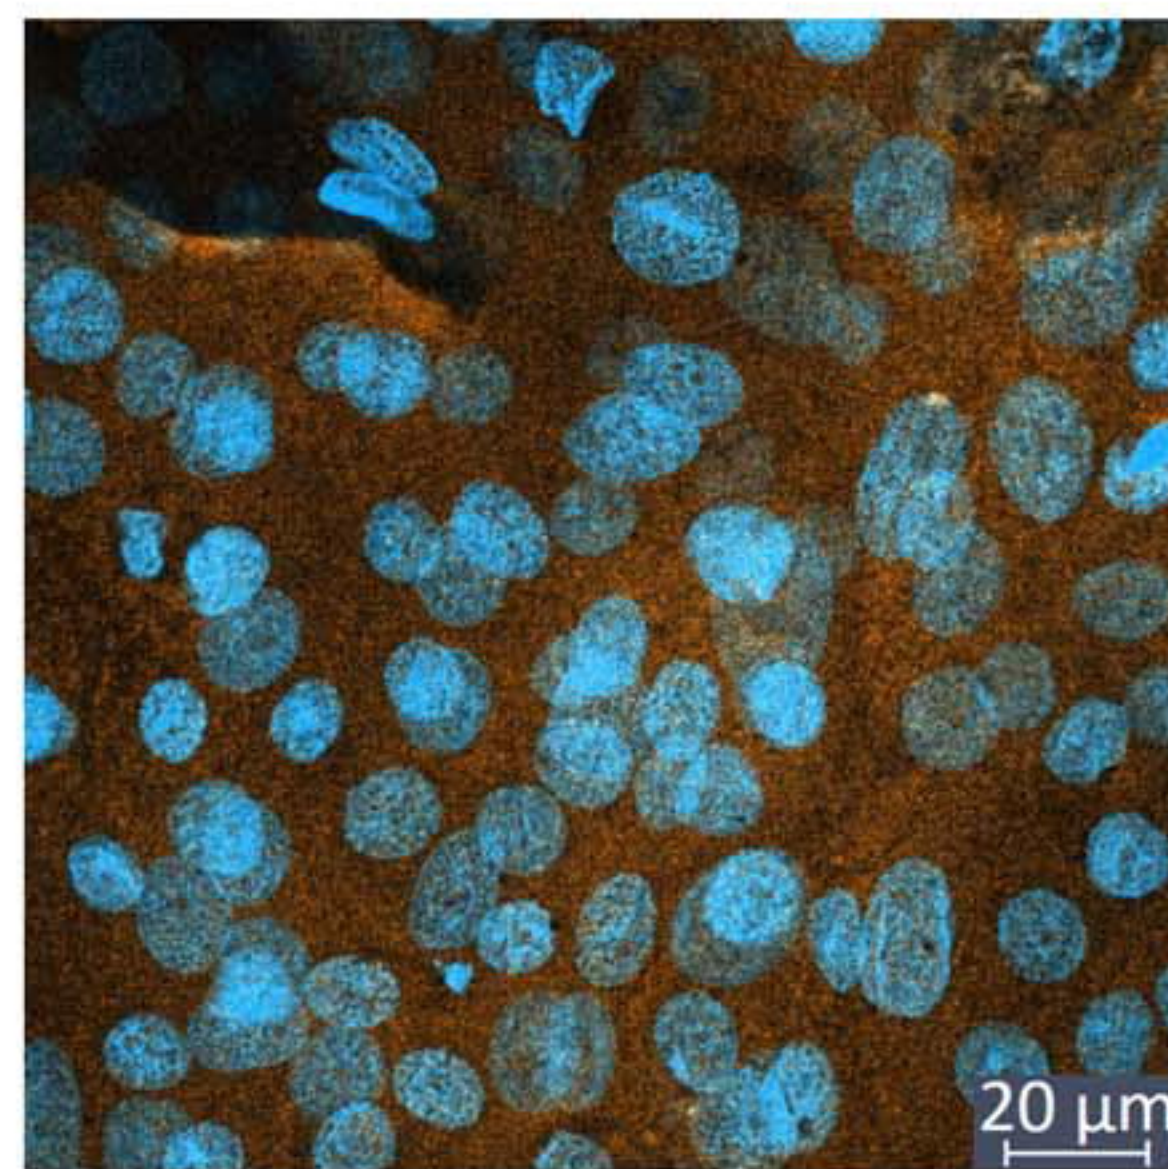

**CD34 X400**

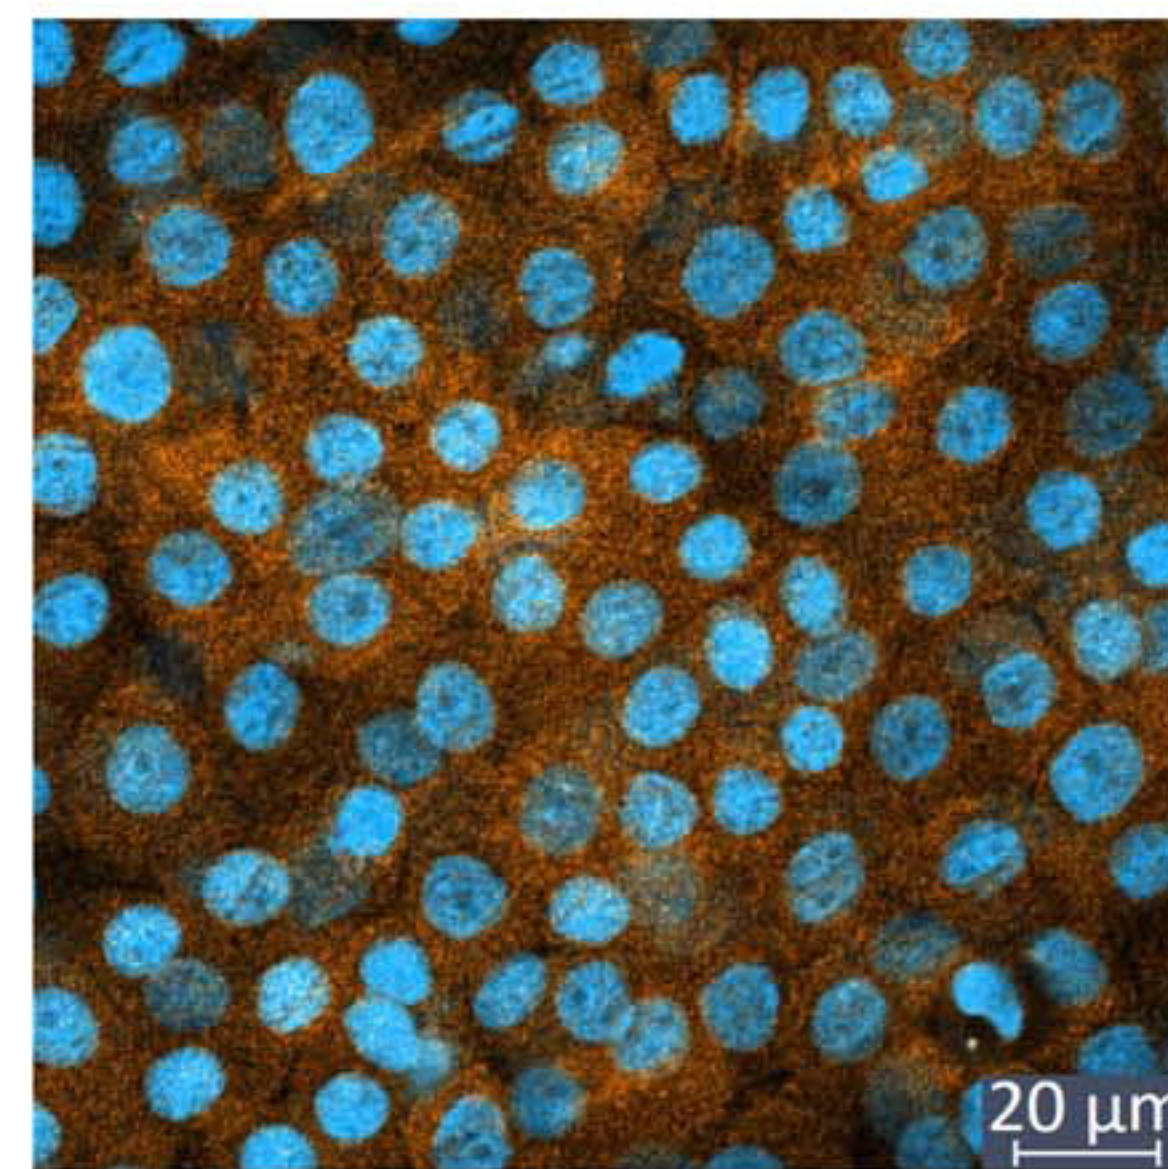

**CD271 X400**

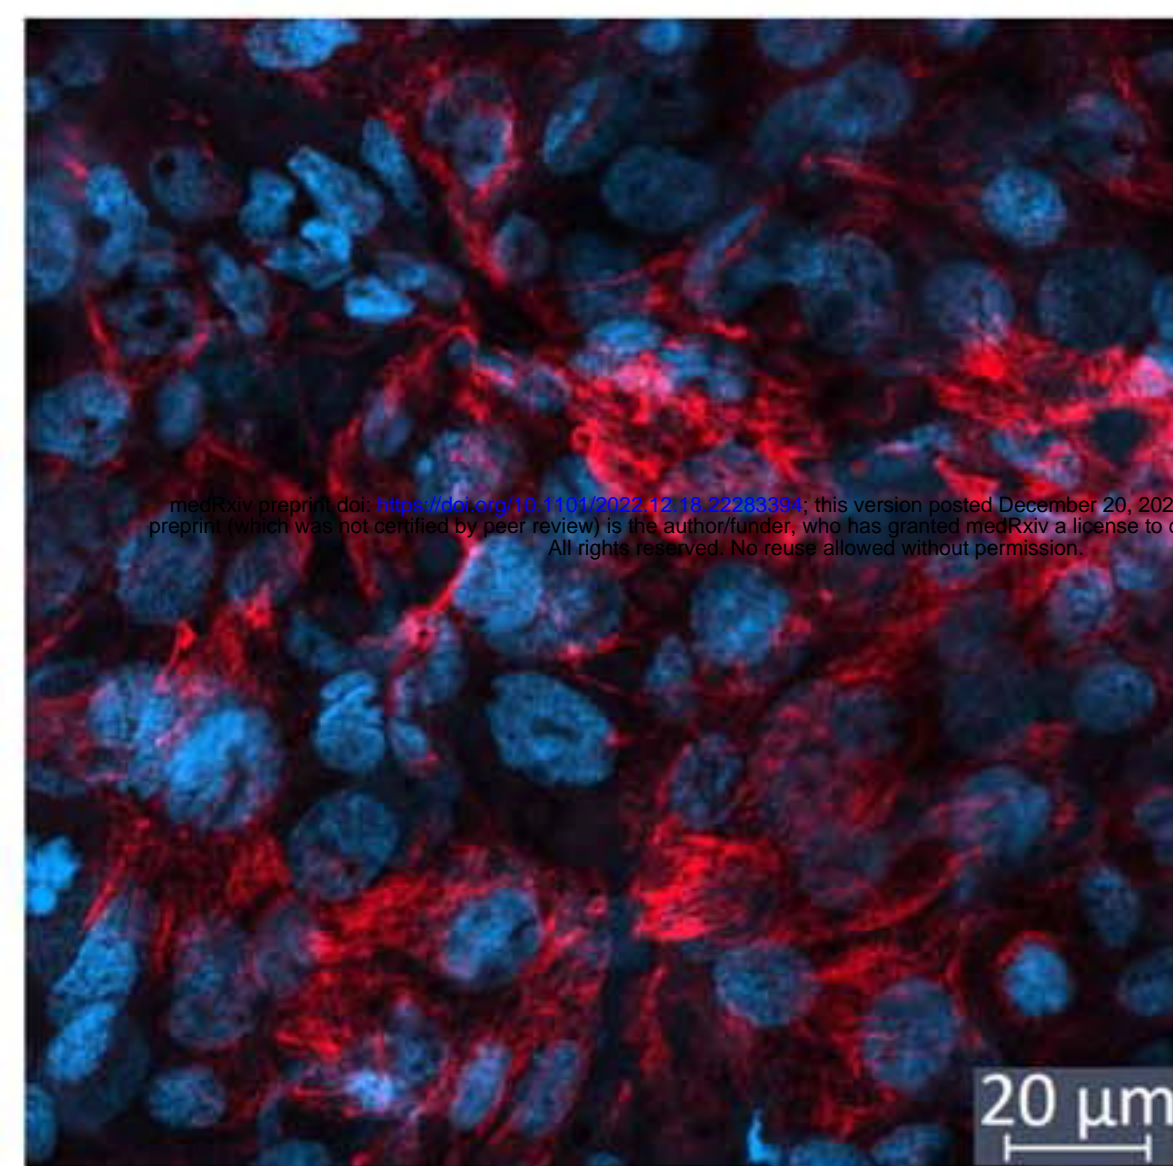

**LAMB3 X400**

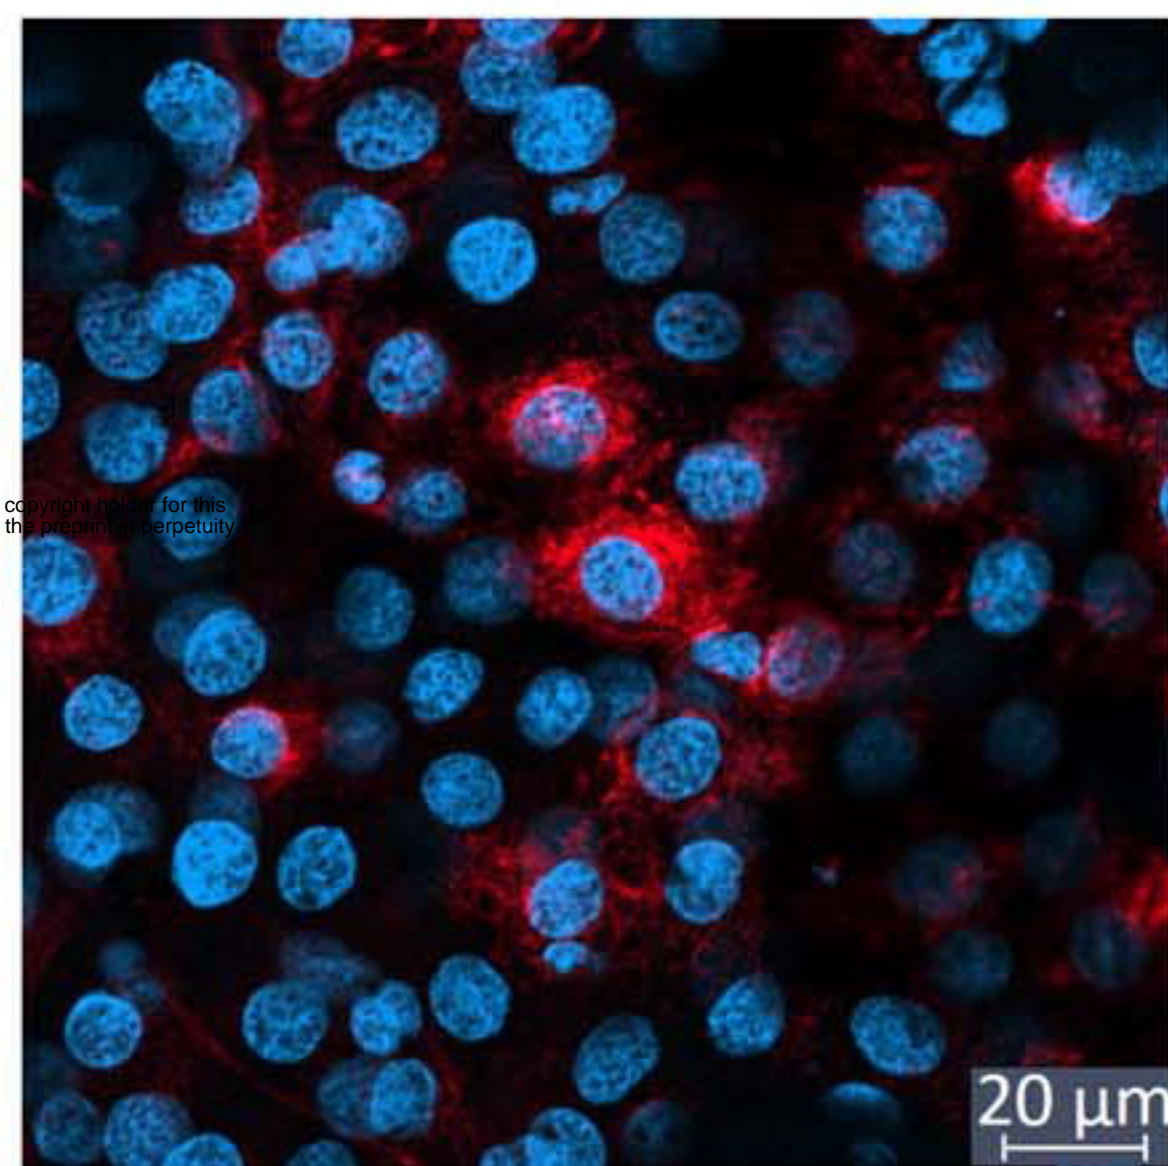

**KRT16 X400**

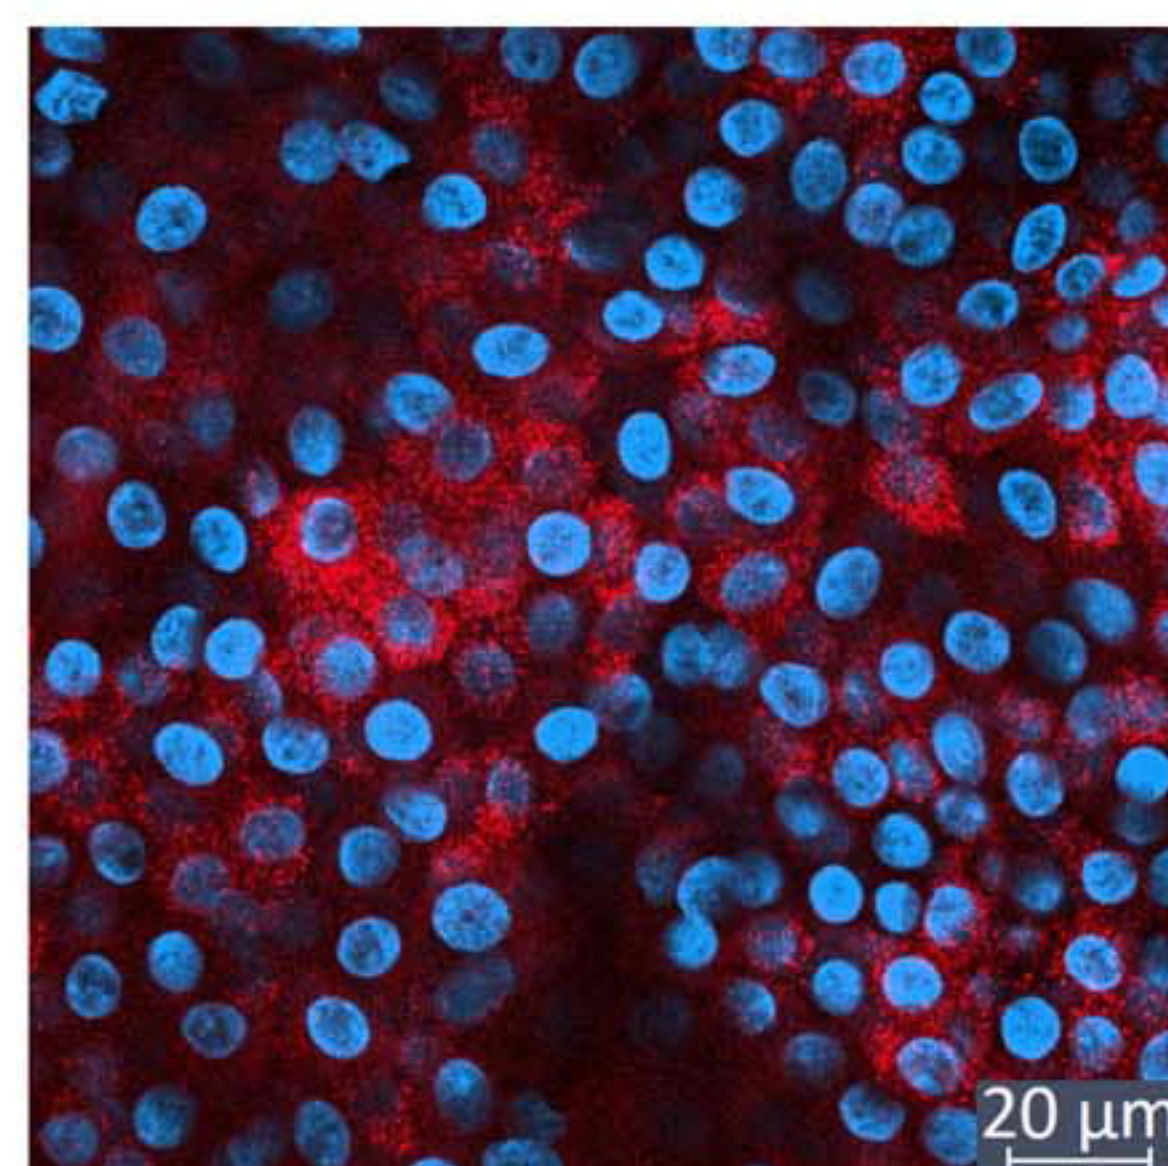

**KRT17 X400**

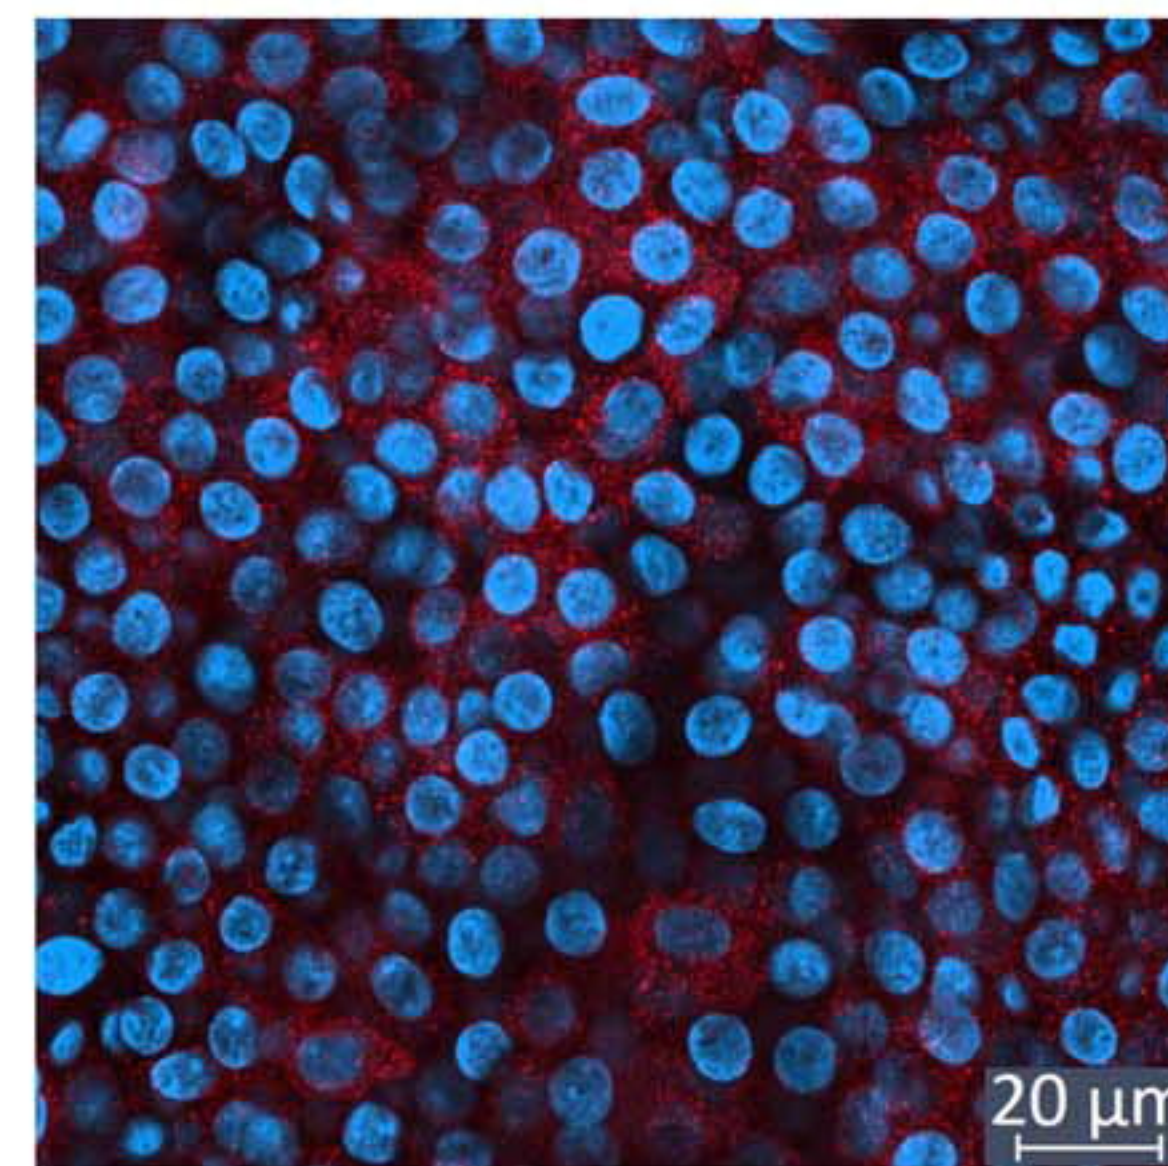

**KRT6C X400**

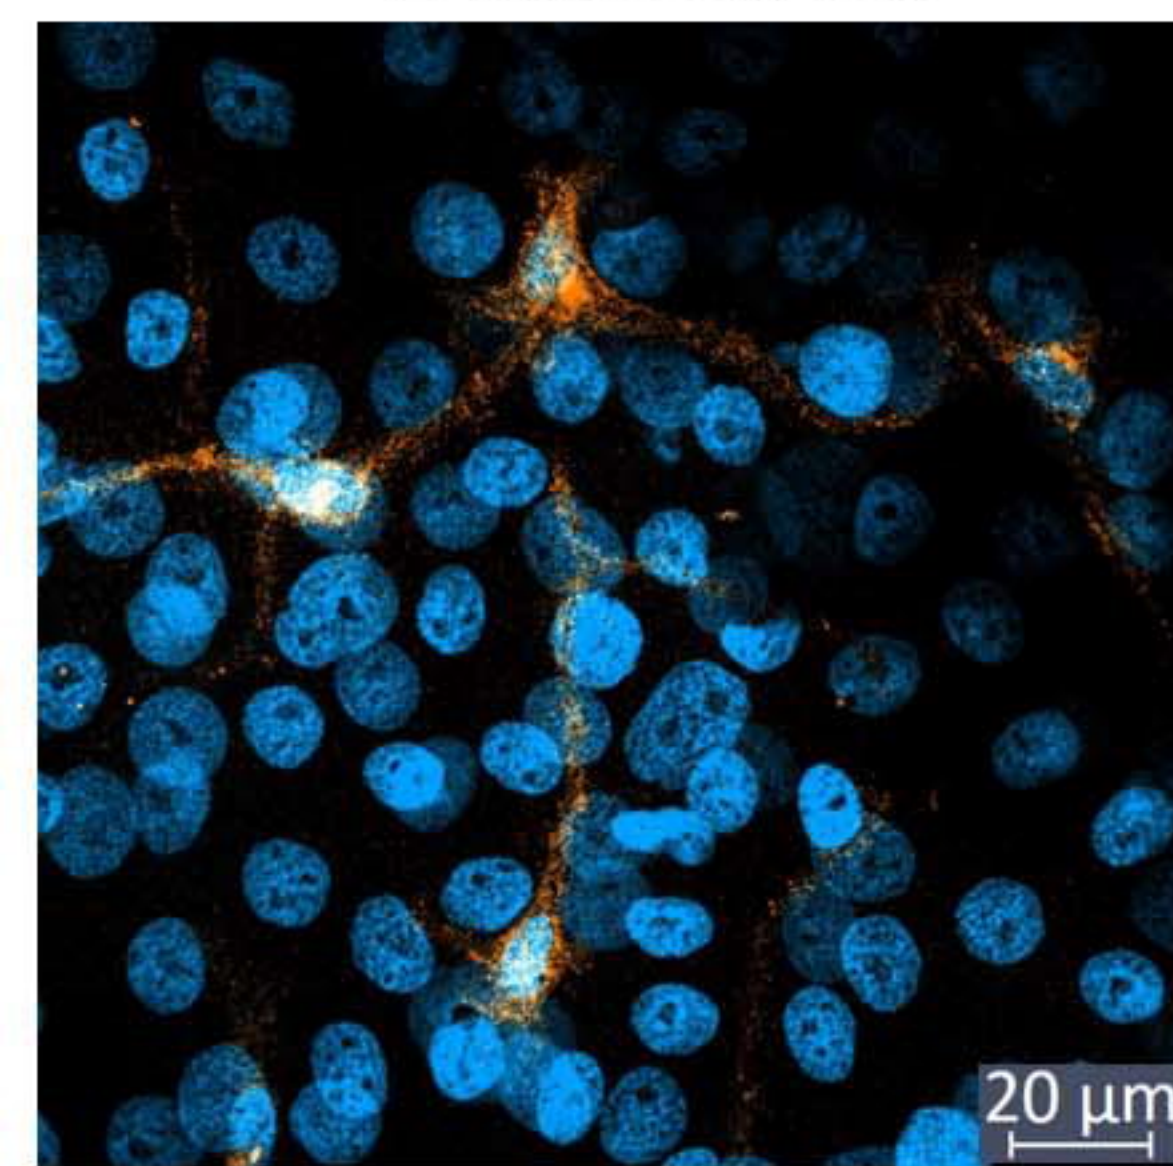

**TRP1 X400**

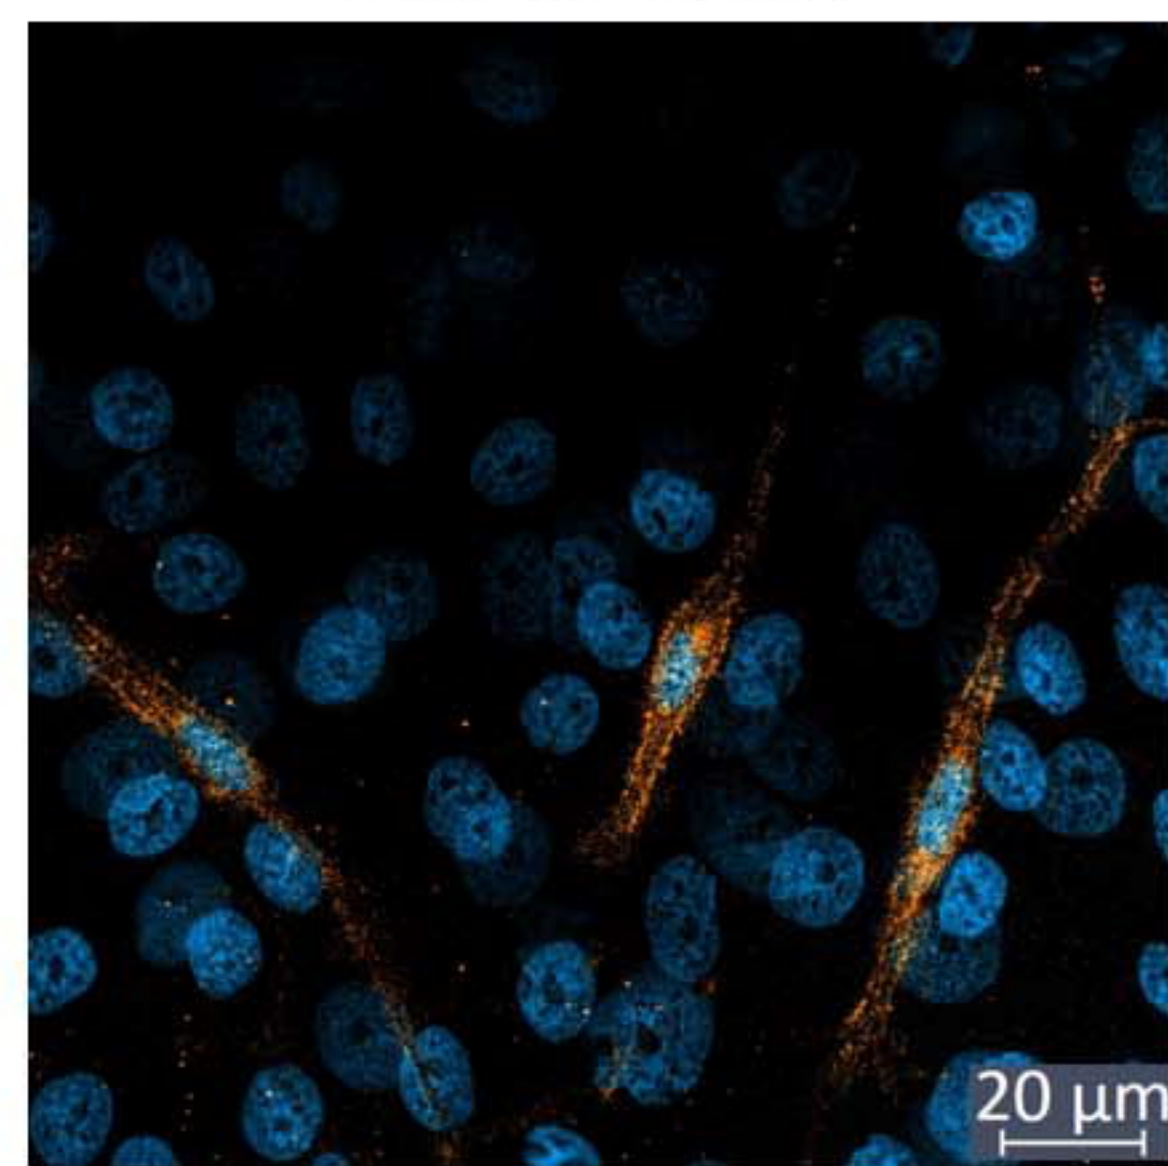

**PMEL X400**

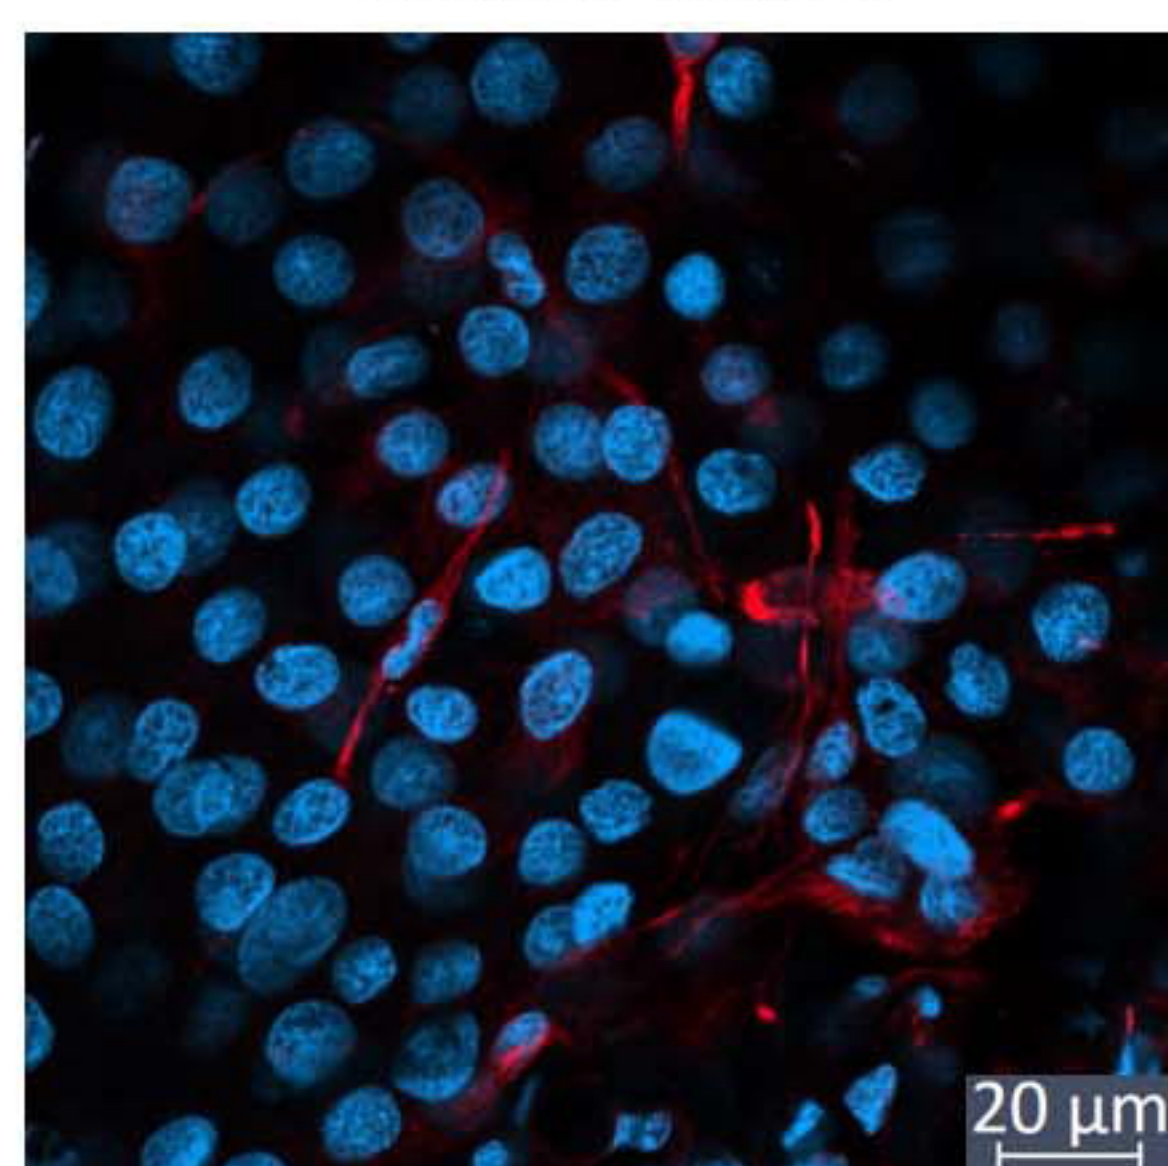

**DCT X400**
